# Supplementary material for: European Stakeholder Learnings Regarding Biosimilars: Part I—Improving Biosimilar Understanding and Adoption
Source: PubMed Central journal article supplement — BioDrugs. 2020 Nov 3;34(6):783–96. doi: 10.1007/s40259-020-00452-9 (PMC7669769; doi:10.1007/s40259-020-00452-9), 2020-11-03
Supplement: 40259_2020_452_MOESM2_ESM.pdf [file 40259_2020_452_MOESM2_ESM.pdf]

## European stakeholder learnings regarding biosimilars: Part I – improving biosimilar understanding and adoption

BioDrugs

Liese Barbier<sup>1\*</sup>, Steven Simoens<sup>1</sup>, Arnold G. Vulto<sup>1,2+\*</sup>, Isabelle Huys<sup>1+</sup>

<sup>1</sup>KU Leuven, Department of Pharmaceutical and Pharmacological Sciences, Leuven, Belgium

<sup>2</sup>Hospital Pharmacy, Erasmus University Medical Center, Rotterdam, the Netherlands

+ Joint last author: these authors contributed equally to this work

\* Corresponding author:

Arnold G. Vulto Contact: a.vulto@gmail.com

Liese Barbier Contact: liese.barbier@kuleuven.be

### Online Resource 2. Inclusion and exclusion criteria applied in selection of identified articles

| Inclusion and exclusion criteria applied in selection of identified articles                                                                                                                                                                                                           |                                                                                                                                                                                                                                                                                                                                                                                              |
|----------------------------------------------------------------------------------------------------------------------------------------------------------------------------------------------------------------------------------------------------------------------------------------|----------------------------------------------------------------------------------------------------------------------------------------------------------------------------------------------------------------------------------------------------------------------------------------------------------------------------------------------------------------------------------------------|
| Inclusion criteria                                                                                                                                                                                                                                                                     | Exclusion criteria                                                                                                                                                                                                                                                                                                                                                                           |
| <ul style="list-style-type: none"><li>- Reported perspectives of at least one HCP (physician, pharmacist, nurse) or patient stakeholder group</li><li>- Stakeholder perspective reporting based on original research (e.g. via surveys, interviews, focus group discussions)</li></ul> | <ul style="list-style-type: none"><li>- Paper reporting about the perspective solely of non-HCP or patient stakeholder group (e.g. papers with a sole focus on the payer perspective)</li><li>- Non original research oriented papers, illustrating a stakeholder perspective such as literature reviews, expert opinion papers, stakeholder opinion papers or position statements</li></ul> |

*HCP: healthcare professional*
