# Supplementary material for: European Stakeholder Learnings Regarding Biosimilars: Part I—Improving Biosimilar Understanding and Adoption
Source: PubMed Central journal article supplement — BioDrugs. 2020 Nov 3;34(6):783–96. doi: 10.1007/s40259-020-00452-9 (PMC7669769; doi:10.1007/s40259-020-00452-9), 2020-11-03
Supplement: 40259_2020_452_MOESM3_ESM.pdf [file 40259_2020_452_MOESM3_ESM.pdf]

## European stakeholder learnings regarding biosimilars: Part I – improving biosimilar understanding and adoption

BioDrugs

Liese Barbier<sup>1\*</sup>, Steven Simoens<sup>1</sup>, Arnold G. Vulto<sup>1,2+\*</sup>, Isabelle Huys<sup>1+</sup>

<sup>1</sup>KU Leuven, Department of Pharmaceutical and Pharmacological Sciences, Leuven, Belgium

<sup>2</sup>Hospital Pharmacy, Erasmus University Medical Center, Rotterdam, the Netherlands

+ Joint last author: these authors contributed equally to this work

\* Corresponding author:

Arnold G. Vulto Contact: a.vulto@gmail.com

Liese Barbier Contact: liese.barbier@kuleuven.be

### Online Resource 3. Main topics addressed during the interviews

| Main topics addressed during the interviews                                                                                                                            |
|------------------------------------------------------------------------------------------------------------------------------------------------------------------------|
| 1. Views about stakeholder information and education needs for biosimilars                                                                                             |
| 2. Views about aspects related to regulatory evaluation of biosimilars                                                                                                 |
| Questions about the general framework                                                                                                                                  |
| Questions about the tailoring of phase III clinical data                                                                                                               |
| Questions about extrapolation of indications                                                                                                                           |
| Interchangeability designation                                                                                                                                         |
| Immunogenicity testing                                                                                                                                                 |
| <i>Small differences existed between the topic guides of the different stakeholder groups, allowing tailoring of the questions to the individual stakeholder group</i> |
