# Supplementary material for: European Stakeholder Learnings Regarding Biosimilars: Part I—Improving Biosimilar Understanding and Adoption
Source: PubMed Central journal article supplement — BioDrugs. 2020 Nov 3;34(6):783–96. doi: 10.1007/s40259-020-00452-9 (PMC7669769; doi:10.1007/s40259-020-00452-9), 2020-11-03
Supplement: 40259_2020_452_MOESM4_ESM.pdf [file 40259_2020_452_MOESM4_ESM.pdf]

## European stakeholder learnings regarding biosimilars: Part I – improving biosimilar understanding and adoption

BioDrugs

Liese Barbier<sup>1\*</sup>, Steven Simoens<sup>1</sup>, Arnold G. Vulto<sup>1,2+\*</sup>, Isabelle Huys<sup>1+</sup>

<sup>1</sup>KU Leuven, Department of Pharmaceutical and Pharmacological Sciences, Leuven, Belgium

<sup>2</sup>Hospital Pharmacy, Erasmus University Medical Center, Rotterdam, the Netherlands

<sup>+</sup> Joint last author: these authors contributed equally to this work

<sup>\*</sup> Corresponding author:

Arnold G. Vulto Contact: a.vulto@gmail.com

Liese Barbier Contact: liese.barbier@kuleuven.be

### Online Resource 4. Structured literature review of biosimilar stakeholder understanding and perception research - Overview of study parameters and main results

| Table I Knowledge and perceptions of physicians about biosimilars: overview of study parameters and main results of relevant literature |                                       |        |                            |     |                       |             |                                                                                                                                                                                                                                             |                                                                                                                                                                                                                                                                       |
|-----------------------------------------------------------------------------------------------------------------------------------------|---------------------------------------|--------|----------------------------|-----|-----------------------|-------------|---------------------------------------------------------------------------------------------------------------------------------------------------------------------------------------------------------------------------------------------|-----------------------------------------------------------------------------------------------------------------------------------------------------------------------------------------------------------------------------------------------------------------------|
| Year                                                                                                                                    | Authors                               | Method | Therapeutic area/specialty | N   | Country/region        | COI/funding | Topics assessed                                                                                                                                                                                                                             | Main result(s)/conclusion                                                                                                                                                                                                                                             |
| <b>Gastroenterology</b>                                                                                                                 |                                       |        |                            |     |                       |             |                                                                                                                                                                                                                                             |                                                                                                                                                                                                                                                                       |
| 2014                                                                                                                                    | Danese, S. <i>et al.</i> <sup>1</sup> | Survey | Gastroenterology           | 307 | Europe (ECCO members) | B           | <ul style="list-style-type: none"> <li>Awareness of biosimilar monoclonal antibodies</li> <li>IBD specialists readiness to use these therapies</li> <li>General aspects, interchangeability, traceability and regulatory issues,</li> </ul> | <ul style="list-style-type: none"> <li>Majority had little or no confidence about the use of biosimilars</li> <li>Majority expressed concerns about immunogenicity, safety and interchangeability, extrapolation of indications and automatic substitution</li> </ul> |

|                     |                                         |                            |                  |     |                       |     |                                                                                                                                                                                                                                                                              |                                                                                                                                                                                                                                                                         |
|---------------------|-----------------------------------------|----------------------------|------------------|-----|-----------------------|-----|------------------------------------------------------------------------------------------------------------------------------------------------------------------------------------------------------------------------------------------------------------------------------|-------------------------------------------------------------------------------------------------------------------------------------------------------------------------------------------------------------------------------------------------------------------------|
|                     |                                         |                            |                  |     |                       |     | extrapolation                                                                                                                                                                                                                                                                |                                                                                                                                                                                                                                                                         |
| 2016                | Baji, P. <i>et al.</i> <sup>2</sup>     | Discrete choice experiment | Gastroenterology | 51  | Hungary               | A   | <ul style="list-style-type: none"> <li>• Preferences for biosimilars in ulcerative colitis</li> </ul>                                                                                                                                                                        | <ul style="list-style-type: none"> <li>• Most gastroenterologists have concerns about using biosimilars.</li> <li>• Most are willing to consider using biosimilars to an increase in patient access to biological treatment</li> </ul>                                  |
| 2016                | Danese, S. <i>et al.</i> <sup>3</sup>   | Survey                     | Gastroenterology | 118 | Europe (ECCO members) | B   | <ul style="list-style-type: none"> <li>• Evolution of IBD specialists' thinking about biosimilars one year after they became available in the European Union</li> <li>• Advantages and issues, interchangeability, substitution, extrapolation, confidence in use</li> </ul> | <ul style="list-style-type: none"> <li>• IBD physicians generally well informed and educated about biosimilars</li> <li>• Compared with 2013<sup>1</sup>, now fewer concerns and more confidence about the use of biosimilars in clinical practice</li> </ul>           |
| 2019                | Malter, L.B. <i>et al.</i> <sup>4</sup> | Survey                     | Gastroenterology | 200 | Non-specified         | E   | <ul style="list-style-type: none"> <li>• Educational and resource needs of clinicians caring for IBD patients</li> </ul>                                                                                                                                                     | <ul style="list-style-type: none"> <li>• Topic of biosimilars was among the areas of greatest educational need for practitioners in IBD</li> </ul>                                                                                                                      |
| 2019                | Park, S.K. <i>et al.</i> <sup>5</sup>   | Survey                     | Gastroenterology | 151 | Asia (via AOCC)       | A   | <ul style="list-style-type: none"> <li>• Awareness regarding biosimilar monoclonal antibodies (advantages and issues, interchangeability, substitution, extrapolation, confidence in use)</li> </ul>                                                                         | <ul style="list-style-type: none"> <li>• Participants were generally well informed about biosimilars</li> <li>• Compared to results of ECCO survey conducted in 2015<sup>3</sup>, more concerns and less confidence about the use of biosimilars in practice</li> </ul> |
| <b>Rheumatology</b> |                                         |                            |                  |     |                       |     |                                                                                                                                                                                                                                                                              |                                                                                                                                                                                                                                                                         |
| 2015                | Grabowski, D. <i>et al.</i>             | Survey                     | Rheumatology     | 81  | Canada                | C/D | <ul style="list-style-type: none"> <li>• Knowledge and attitudes towards</li> </ul>                                                                                                                                                                                          | <ul style="list-style-type: none"> <li>• 1/3 familiar with biosimilars, 1/3 agreed/strongly agreed to be</li> </ul>                                                                                                                                                     |

|      |                                         |                            |              |     |                                                                                        |   |                                                                                                                                                                                                      |                                                                                                                                                                                                                                                                                                                                                                                                                                                                                                  |
|------|-----------------------------------------|----------------------------|--------------|-----|----------------------------------------------------------------------------------------|---|------------------------------------------------------------------------------------------------------------------------------------------------------------------------------------------------------|--------------------------------------------------------------------------------------------------------------------------------------------------------------------------------------------------------------------------------------------------------------------------------------------------------------------------------------------------------------------------------------------------------------------------------------------------------------------------------------------------|
|      | <i>al.</i> <sup>6</sup>                 |                            |              |     |                                                                                        |   | biosimilars<br>(familiarity,<br>extrapolation,<br>substitution)                                                                                                                                      | comfortable with indication<br>extrapolation <ul style="list-style-type: none"> <li>88 % concerned/very concerned if a pharmacist had the ability to substitute without physician's approval</li> </ul>                                                                                                                                                                                                                                                                                          |
| 2016 | Beck, M.<br><i>et al.</i> <sup>7</sup>  | Survey                     | Rheumatology | 116 | France                                                                                 | B | <ul style="list-style-type: none"> <li>Knowledge, experience and opinions with regard to biosimilars</li> <li>Barriers to and possible options to promote their prescription</li> </ul>              | <ul style="list-style-type: none"> <li>Little knowledge and lack of available information about biosimilars reported</li> <li>Most common barriers: indication extrapolation and a lack of data about tolerability</li> <li>Rather favourable towards the implementation of biosimilars, but a majority expressed a negative opinion about pharmacy substitution</li> <li>Communication initiatives, experience and availability of clinical data can help overcome misunderstandings</li> </ul> |
| 2016 | Gavan, S.<br><i>et al.</i> <sup>8</sup> | Semi-structured interviews | Rheumatology | 11  | UK                                                                                     | A | <ul style="list-style-type: none"> <li>Factors which influence when prescribing anti-TNF therapies</li> </ul>                                                                                        | <ul style="list-style-type: none"> <li>Factors which may influence anti-TNF prescribing: cost, emergence of evidence, interpretation of clinical guidelines, patient involvement in decision making, desire for clinical autonomy, influence of clinical service commissioners</li> </ul>                                                                                                                                                                                                        |
| 2016 | Kellner, H. <i>et al.</i> <sup>9</sup>  | Survey                     | Rheumatology | 222 | Finland, France, Germany, UK, Hungary, Italy, Ireland, Norway, Portugal, Spain, Sweden | B | <ul style="list-style-type: none"> <li>Perspectives and knowledge on biosimilars, including regulatory aspects and manufacturing principles</li> <li>Comfort with prescribing biosimilars</li> </ul> | <ul style="list-style-type: none"> <li>Knowledge and awareness about biosimilars is growing; high levels of comfort in prescribing biosimilars</li> <li>Confusion still exists about definitions, regulations and manufacturing standards</li> </ul>                                                                                                                                                                                                                                             |
| 2017 | Gibofsky,                               | Survey                     | Rheumatology | 131 | US                                                                                     | D | <ul style="list-style-type: none"> <li>Familiarity with</li> </ul>                                                                                                                                   | <ul style="list-style-type: none"> <li>Knowledge gaps: a lack of</li> </ul>                                                                                                                                                                                                                                                                                                                                                                                                                      |

|                    |                                          |        |              |     |                                               |   |                                                                                                                                                                             |                                                                                                                                                                                                                                                                                                                                                                                                          |
|--------------------|------------------------------------------|--------|--------------|-----|-----------------------------------------------|---|-----------------------------------------------------------------------------------------------------------------------------------------------------------------------------|----------------------------------------------------------------------------------------------------------------------------------------------------------------------------------------------------------------------------------------------------------------------------------------------------------------------------------------------------------------------------------------------------------|
|                    | A. <i>et al.</i> <sup>10</sup>           |        |              |     |                                               |   | <ul style="list-style-type: none"> <li>• biosimilars, the concept of biosimilarity, and their approval process</li> </ul>                                                   | <ul style="list-style-type: none"> <li>• understanding of biosimilarity, the availability of approved biosimilars</li> <li>• Education about biosimilars, extrapolation, and interchangeability needed</li> </ul>                                                                                                                                                                                        |
| 2019               | Klink, A. <i>et al.</i> <sup>11</sup>    | Survey | Rheumatology | 54  | US                                            | E | <ul style="list-style-type: none"> <li>• Experience with and perceptions of non-medical switching between RPs and their biosimilars in routine clinical practice</li> </ul> | <ul style="list-style-type: none"> <li>• Most common concerns for prescribing biosimilars were efficacy (43%), safety (41%), and patient's insurance policy constraint (31%)</li> <li>• Majority of switching appeared to be for non-medical reasons, and a minority of rheumatologists report cost-savings related to biosimilars</li> </ul>                                                            |
| 2019               | Zhang, C. <i>et al.</i> <sup>12</sup>    | Survey | Rheumatology | 261 | United Kingdom, France, Italy, Spain, Germany | A | <ul style="list-style-type: none"> <li>• Perceptions of efficacy and safety for biosimilars relative to their RPs</li> </ul>                                                | <ul style="list-style-type: none"> <li>• Biosimilars score lower on overall satisfaction compared to reference products and are less frequently associated with specific efficacy attributes compared to branded products</li> </ul>                                                                                                                                                                     |
| <b>Dermatology</b> |                                          |        |              |     |                                               |   |                                                                                                                                                                             |                                                                                                                                                                                                                                                                                                                                                                                                          |
| 2017               | Barsell, A. <i>et al.</i> <sup>13</sup>  | Survey | Dermatology  | 97  | US                                            | E | <ul style="list-style-type: none"> <li>• Knowledge about and perception on biosimilars (awareness, definition, substitution, naming, prescribing behaviour)</li> </ul>      | <ul style="list-style-type: none"> <li>• Only 37% of dermatologists aware that a biosimilar is highly similar to a licensed reference biological product</li> <li>• Only 25% would likely prescribe biosimilars, 38% would try biosimilars on a select group of patients before trying it on a majority of their patients</li> <li>• A biosimilar knowledge gap exists amongst dermatologists</li> </ul> |
| 2017               | Manalo, I.F. <i>et al.</i> <sup>14</sup> | Survey | Dermatology  | 116 | US                                            | E | <ul style="list-style-type: none"> <li>• Familiarity with biosimilars and interchangeability</li> <li>• Perspectives toward biosimilar properties, including</li> </ul>     | <ul style="list-style-type: none"> <li>• 62.9% slightly-very unfamiliar with biosimilars</li> <li>• Concerns about safety issues when interchanging without provider knowledge</li> </ul>                                                                                                                                                                                                                |

|                              |                                          |        |                       |     |                                                     |   |                                                                                                                                                                                                                              |                                                                                                                                                                                                                                                                                                                                                                           |
|------------------------------|------------------------------------------|--------|-----------------------|-----|-----------------------------------------------------|---|------------------------------------------------------------------------------------------------------------------------------------------------------------------------------------------------------------------------------|---------------------------------------------------------------------------------------------------------------------------------------------------------------------------------------------------------------------------------------------------------------------------------------------------------------------------------------------------------------------------|
|                              |                                          |        |                       |     |                                                     |   | interchangeability, extrapolation, and immunogenicity risk                                                                                                                                                                   |                                                                                                                                                                                                                                                                                                                                                                           |
| <b>Oncology, haematology</b> |                                          |        |                       |     |                                                     |   |                                                                                                                                                                                                                              |                                                                                                                                                                                                                                                                                                                                                                           |
| 2014                         | Baer, W.H. <i>et al.</i> <sup>15</sup>   | Survey | Oncology, haematology | 450 | United States, Mexico, Turkey, Russia, Brazil       | D | <ul style="list-style-type: none"> <li>Access to rituximab and identified potential barriers to its use</li> <li>Whether availability of a biosimilar to rituximab would improve access to, and use of, rituximab</li> </ul> | <ul style="list-style-type: none"> <li>Less than 40% considered rituximab as easy to access from a cost perspective</li> <li>Over half of physicians reported that they would increase use of rituximab if a biosimilar was available</li> </ul>                                                                                                                          |
| 2017                         | Nabhan, C. <i>et al.</i> <sup>16</sup>   | Survey | Oncology              | 61  | US                                                  | D | <ul style="list-style-type: none"> <li>Perceptions on biosimilars</li> <li>Barriers to uptake is to develop strategies to increase chances of biosimilars' success in oncology</li> </ul>                                    | <ul style="list-style-type: none"> <li>Willingness to incorporate biosimilars in daily practice demonstrated</li> <li>Educational gaps exist about efficacy and toxicity data, cost, reimbursement, and regulatory processes</li> </ul>                                                                                                                                   |
| 2019                         | Giuliani, R. <i>et al.</i> <sup>17</sup> | Survey | Oncology              | 393 | Europe (via ESMO), Asia, America, Africa, Australia | B | <ul style="list-style-type: none"> <li>Level of knowledge, understanding and comfort of use of biosimilars</li> </ul>                                                                                                        | <ul style="list-style-type: none"> <li>Most rate their general knowledge of biosimilars as average to very high</li> <li>Potential increased risk of immunogenicity remains a significant concern of switching</li> <li>Identified gaps in knowledge: biosimilar development, clinical trial design and endpoint selection, and requirements for extrapolation</li> </ul> |
| 2020                         | Hadoussa, S. <i>et al.</i> <sup>18</sup> | Survey | Haematology, oncology | 107 | Tunisia                                             | A | <ul style="list-style-type: none"> <li>Knowledge and perceptions on biosimilars to identify problems related to</li> </ul>                                                                                                   | <ul style="list-style-type: none"> <li>Approximately 1/5 of physicians defines biosimilar as a chemical</li> <li>About 29% do not differentiate between a biosimilar and a generic</li> </ul>                                                                                                                                                                             |

|                                   |                                              |        |                                                                           |     |                                   |          |                                                                                                                                                                                                                                                             |                                                                                                                                                                                                                                                                                                                                                                          |
|-----------------------------------|----------------------------------------------|--------|---------------------------------------------------------------------------|-----|-----------------------------------|----------|-------------------------------------------------------------------------------------------------------------------------------------------------------------------------------------------------------------------------------------------------------------|--------------------------------------------------------------------------------------------------------------------------------------------------------------------------------------------------------------------------------------------------------------------------------------------------------------------------------------------------------------------------|
|                                   |                                              |        |                                                                           |     |                                   |          | biosimilars and propose solutions for improvement                                                                                                                                                                                                           | <ul style="list-style-type: none"> <li>Only 3.7% believe to be well informed about biosimilars</li> <li>Health authorities should carry out training programs on biosimilars and introduce clear and effective legislation in order to allow better access to health care services</li> </ul>                                                                            |
| <b>General practice</b>           |                                              |        |                                                                           |     |                                   |          |                                                                                                                                                                                                                                                             |                                                                                                                                                                                                                                                                                                                                                                          |
| 2018                              | Micó-Pérez, R.M. <i>et al.</i> <sup>19</sup> | Survey | Primary care/general practice                                             | 701 | Spain                             | E        | <ul style="list-style-type: none"> <li>Awareness and training needs on biosimilars</li> </ul>                                                                                                                                                               | <ul style="list-style-type: none"> <li>Biosimilar knowledge was low</li> <li>Need of further training: information on biosimilars currently available in primary care, aspects regarding prescription, interchangeability and pharmacovigilance requirements</li> </ul>                                                                                                  |
| <b>Multiple therapeutic areas</b> |                                              |        |                                                                           |     |                                   |          |                                                                                                                                                                                                                                                             |                                                                                                                                                                                                                                                                                                                                                                          |
| 2014                              | BioTrends research group <sup>20</sup>       | Survey | Rheumatology, gastroenterology                                            | 184 | France, Germany, US               | D        | <ul style="list-style-type: none"> <li>Biosimilar clinical trial requirements, adoption rates, pricing</li> <li>Familiarity, substitution, extrapolation, uptake drivers, reimbursement</li> <li>Concerns about and requirements for biosimilars</li> </ul> | <ul style="list-style-type: none"> <li>Majority of participants say they are at least moderately familiar with biosimilars</li> <li>Majority of participants in Europe believe that biosimilars are at least very similar to the RP. A significant portion of US participants believes there could be significant differences between a biosimilar and the RP</li> </ul> |
| 2014                              | Dolinar, R.O. <i>et al.</i> <sup>21</sup>    | Survey | Nephrology, rheumatology, dermatology, neurology, endocrinology, oncology | 470 | France, Germany, Italy, Spain, UK | D (ASBM) | <ul style="list-style-type: none"> <li>Biosimilar naming, label transparency, physician choice</li> </ul>                                                                                                                                                   | <ul style="list-style-type: none"> <li>Responses demonstrate the need for distinguishable non-proprietary names to be given for biologicals</li> </ul>                                                                                                                                                                                                                   |
| 2015                              | Gewanter, H.L. <i>et</i>                     | Survey | Dermatology, oncology,                                                    | 399 | Argentina, Brazil,                | D (ASBM) | <ul style="list-style-type: none"> <li>Understanding and use of biosimilars</li> </ul>                                                                                                                                                                      | <ul style="list-style-type: none"> <li>35% did not consider themselves familiar with biosimilars</li> </ul>                                                                                                                                                                                                                                                              |

|      |                                             |        |                                                                                                                    |                                 |                                                               |          |                                                                                                                                                                                                                                                                        |                                                                                                                                                                                                                                                                                                                                                                                                                                                                                                                                                                                          |
|------|---------------------------------------------|--------|--------------------------------------------------------------------------------------------------------------------|---------------------------------|---------------------------------------------------------------|----------|------------------------------------------------------------------------------------------------------------------------------------------------------------------------------------------------------------------------------------------------------------------------|------------------------------------------------------------------------------------------------------------------------------------------------------------------------------------------------------------------------------------------------------------------------------------------------------------------------------------------------------------------------------------------------------------------------------------------------------------------------------------------------------------------------------------------------------------------------------------------|
|      | <i>al.</i> <sup>22</sup>                    |        | neurology,<br>endocrinology,<br>rheumatology,<br>nephrology,<br>haematology,<br>oncology                           |                                 | Colombia,<br>Mexico                                           |          | <ul style="list-style-type: none"> <li>Concerns for the future related to biosimilars</li> </ul>                                                                                                                                                                       | <ul style="list-style-type: none"> <li>94% thought a suffix would help ensure that their patients received the right medicine</li> </ul>                                                                                                                                                                                                                                                                                                                                                                                                                                                 |
| 2016 | Hallersten, A. <i>et al.</i> <sup>23</sup>  | Survey | Dermatology,<br>endocrinology,<br>gastroenterology,<br>hematology,<br>nephrology,<br>oncology,<br>rheumatology     | 210                             | France,<br>Germany,<br>Italy, Poland,<br>Spain,<br>Sweden, UK | D        | <ul style="list-style-type: none"> <li>Preferences on type and detail of information in the biosimilar label</li> <li>Use of info sources when prescribing biologics including biosimilars</li> </ul>                                                                  | <ul style="list-style-type: none"> <li>The label is an appropriate way to provide physicians with information about biologics</li> <li>Physicians prefer more product-specific information in the biosimilar label</li> </ul>                                                                                                                                                                                                                                                                                                                                                            |
| 2016 | Molinari, A.L. <i>et al.</i> <sup>24/</sup> | Survey | Neurology,<br>nephrology,<br>rheumatology,<br>dermatology,<br>endocrinology,<br>oncology                           | 376 US,<br>470 EU<br>physicians | EU (Spain,<br>UK, Italy,<br>France,<br>Germany)<br>and US     | D (ASBM) | <ul style="list-style-type: none"> <li>Differences in understanding of biologics and biosimilars in the US and Europe (naming)</li> </ul>                                                                                                                              | <ul style="list-style-type: none"> <li>A significant portion of participants do not understand important differences between RPs and biosimilars</li> <li>Confidence in prescribing and switching linked to naming</li> </ul>                                                                                                                                                                                                                                                                                                                                                            |
| 2017 | Cohen, H. <i>et al.</i> <sup>25</sup>       | Survey | Dermatology,<br>gastroenterology,<br>haematology-<br>oncology, medical<br>oncology,<br>nephrology,<br>rheumatology | 1201                            | US                                                            | D        | <ul style="list-style-type: none"> <li>Awareness, knowledge and perceptions of biosimilars (totality of evidence, extrapolation, interchangeability)</li> <li>Perception of safety and efficacy</li> <li>Preferred info sources</li> <li>Physician interest</li> </ul> | <ul style="list-style-type: none"> <li>Significant need for evidence-based education about biosimilars for physicians across specialities</li> <li>Identification of five major knowledge gaps: defining biologics, biosimilars, and biosimilarity; understanding the approval process and the use of “totality of evidence” concept; understanding that the safety and immunogenicity of a biosimilar are comparable to the RP; understanding the rationale for extrapolation of indications; defining interchangeability and the related pharmacy-level substitution rules”</li> </ul> |

|      |                                            |        |                                                                                             |     |             |          |                                                                                                                                                                                                                                                              |                                                                                                                                                                                                                                                                                                                                                                                                           |
|------|--------------------------------------------|--------|---------------------------------------------------------------------------------------------|-----|-------------|----------|--------------------------------------------------------------------------------------------------------------------------------------------------------------------------------------------------------------------------------------------------------------|-----------------------------------------------------------------------------------------------------------------------------------------------------------------------------------------------------------------------------------------------------------------------------------------------------------------------------------------------------------------------------------------------------------|
| 2017 | Everaerts, M. <sup>26</sup>                | Survey | Dermatology, rheumatology, gastroenterology                                                 | 71  | Belgium     | D        | <ul style="list-style-type: none"> <li>Knowledge, awareness, perceptions on biosimilars (frequency of received info on biosimilars and info sources, extrapolation, substitution, non-medical switching, prescribing decisions, physician choice)</li> </ul> | <ul style="list-style-type: none"> <li>A clear gap between the Northern and Southern regions with respect to the frequency of information received, the knowledge level as well as the place of biosimilars in the treatment algorithm q<sup>2</sup></li> <li>The opinions about extrapolation of indication and switching were divided</li> </ul>                                                        |
| 2017 | Hemmington, A. <i>et al.</i> <sup>27</sup> | Survey | Rheumatology, dermatology, gastroenterology, oncology and haematology                       | 110 | New Zealand | A        | <ul style="list-style-type: none"> <li>Perceptions of biosimilars</li> <li>Factors associated with the acceptance of biosimilars</li> <li>Confidence in extrapolation, switching</li> <li>Explaining a biosimilar to patients</li> </ul>                     | <ul style="list-style-type: none"> <li>Most specialists generally positive about biosimilars; 54-74% confident in the safety, efficacy, manufacturing and pharmacovigilance of biosimilars.</li> <li>Less confident about indication extrapolation and switching</li> <li>Need for guidance on how to explain biosimilars to patients and written patient material</li> </ul>                             |
| 2017 | Murby, S. <i>et al.</i> <sup>28</sup>      | Survey | Dermatology, endocrinology, gastroenterology, nephrology, neurology, oncology, rheumatology | 160 | Australia   | D (ASBM) | <ul style="list-style-type: none"> <li>Views on the naming, substitution and prescribing of RPs and biosimilars</li> </ul>                                                                                                                                   | <ul style="list-style-type: none"> <li>Most respondents agreed on distinct non-proprietary scientific names for biosimilars and reference products</li> <li>Most agreed that robust data are needed to support substitution rather than clinically supervised switching. While the prescribers thought, incorrectly, that biosimilars and RPs are approved through the same regulatory process</li> </ul> |
| 2018 | Jimenez-                                   | Survey | Rheumatology,                                                                               | 35  | Spain       | E        | <ul style="list-style-type: none"> <li>Degree of</li> </ul>                                                                                                                                                                                                  | <ul style="list-style-type: none"> <li>63% did not know the existence of</li> </ul>                                                                                                                                                                                                                                                                                                                       |

|      |                                                |                                         |                                                                                                                  |      |                                                |   |                                                                                                                                                                |                                                                                                                                                                                                                                                                                                                                                                    |
|------|------------------------------------------------|-----------------------------------------|------------------------------------------------------------------------------------------------------------------|------|------------------------------------------------|---|----------------------------------------------------------------------------------------------------------------------------------------------------------------|--------------------------------------------------------------------------------------------------------------------------------------------------------------------------------------------------------------------------------------------------------------------------------------------------------------------------------------------------------------------|
|      | Pichardo, L. <i>et al.</i> <sup>29</sup>       |                                         | gastroenterology, dermatology                                                                                    |      |                                                |   | knowledge about the regulation and variability in manufacturing processes in originator biologics                                                              | <p>changes relative to the manufacturing process; 57% did not know the regulation about the comparability before/after manufacturing change</p> <ul style="list-style-type: none"> <li>94% identified this information as useful</li> <li>Knowledge of this might increase confidence about biosimilars</li> </ul>                                                 |
| 2018 | Karki, C. <i>et al.</i> <sup>30</sup>          | Survey                                  | Rheumatology, dermatology, gastroenterology,                                                                     | 677  | UK, France, Germany, Italy, Spain              | E | <ul style="list-style-type: none"> <li>Perceptions of cost pressure associated with biosimilars</li> </ul>                                                     | <ul style="list-style-type: none"> <li>25-36% of physicians listed payer pressure to use biosimilars as a concern</li> <li>Physicians reported concerns with cost pressures from various sources in endorsing biosimilars</li> <li>Understanding financial implications of and reasons to use biosimilars may help facilitate greater biosimilar access</li> </ul> |
| 2018 | Shah-Manek, B. <i>et al.</i> <sup>31</sup>     | Survey                                  | Rheumatology, dermatology, gastroenterology                                                                      | 670  | EU5                                            | E | <ul style="list-style-type: none"> <li>Perceptions of biosimilars to gain insights on patient access</li> </ul>                                                | <ul style="list-style-type: none"> <li>Differences emerged in the perception of biosimilars across physician specialties</li> <li>Tailored education targeted to specialty could enhance adoption of biosimilars</li> </ul>                                                                                                                                        |
| 2018 | Schwartz, Z. <i>et al.</i> <sup>32</sup>       | Survey (as part of educational program) | Rheumatology, gastroenterology, dermatology, allergology, immunology, primary care, oncology, other specialities | 1546 | Non-specified                                  | B | <ul style="list-style-type: none"> <li>Competence and knowledge of biosimilars</li> <li>Educational gaps related to biosimilar clinical application</li> </ul> | <ul style="list-style-type: none"> <li>Identified gaps in clinicians' understanding about the efficacy, substitution, and indications of biosimilars</li> </ul>                                                                                                                                                                                                    |
| 2019 | Industry Standard Research/ ASBM <sup>33</sup> | Survey                                  | Dermatology, endocrinology, gastroenterology, haematology oncology, immunology,                                  | 579  | France, Germany, Italy, Spain, Switzerland, UK | D | <ul style="list-style-type: none"> <li>Familiarity with biosimilars</li> <li>Prescribing, recording, adverse drug reaction reporting</li> </ul>                | <ul style="list-style-type: none"> <li>40% of prescribers uncomfortable to switch a stable patient to a biosimilar, percentage increased to 58% when asked about switching a patient to a biosimilar for non-medical reasons, highlighting the impact of choice of</li> </ul>                                                                                      |

|                      |                                         |        |                                                                          |     |        |     |                                                                                                                                                                                                                                                      |                                                                                                                                                                                                                                                                                                               |
|----------------------|-----------------------------------------|--------|--------------------------------------------------------------------------|-----|--------|-----|------------------------------------------------------------------------------------------------------------------------------------------------------------------------------------------------------------------------------------------------------|---------------------------------------------------------------------------------------------------------------------------------------------------------------------------------------------------------------------------------------------------------------------------------------------------------------|
|                      |                                         |        | nephrology,<br>neurology,<br>oncology,<br>ophthalmology,<br>rheumatology |     |        |     | <ul style="list-style-type: none"> <li>Automatic substitution, switching, physician choice</li> </ul>                                                                                                                                                | words/framing on HCP perception. The percentage increased to 73% when asked about a third party initiating a switch                                                                                                                                                                                           |
| 2019                 | Karateev D. <i>et al.</i> <sup>34</sup> | Survey | Haematology, gastroenterology, oncology                                  | 206 | Russia | C/D | <ul style="list-style-type: none"> <li>Levels of knowledge and attitudes towards biosimilars and key policies on their use</li> <li>Level of interest in new information on biosimilars</li> <li>What evidence drives treatment decisions</li> </ul> | <ul style="list-style-type: none"> <li>66% had positive impressions regarding the introduction of biosimilars</li> <li>80% lacked understanding of the differences between biosimilars and generics</li> <li>Majority was negative about tender policies limiting choice of therapies for patients</li> </ul> |
| 2019                 | Teeple, A. <i>et al.</i> <sup>35</sup>  | Survey | Rheumatology, dermatology, gastroenterology                              | 297 | US     | D   | <ul style="list-style-type: none"> <li>Level of familiarity with biosimilars</li> <li>Experience with non-medical switching</li> <li>Attitudes towards switching</li> </ul>                                                                          | <ul style="list-style-type: none"> <li>84% of physicians did not want stable patients undergoing a switch</li> <li>A majority of physicians anticipated a negative impact on patient mental health, treatment efficacy, patient safety and physician office management</li> </ul>                             |
| <b>Non-specified</b> |                                         |        |                                                                          |     |        |     |                                                                                                                                                                                                                                                      |                                                                                                                                                                                                                                                                                                               |
| 2016                 | Cassar, K. <i>et al.</i> <sup>36</sup>  | Survey | Non-specified                                                            | 132 | Malta  | A   | <ul style="list-style-type: none"> <li>Perception and awareness on the concept of biosimilars</li> </ul>                                                                                                                                             | <ul style="list-style-type: none"> <li>Awareness on biosimilars in Malta is very low (6%)</li> <li>27% believes that patients can be safely switched between products during treatment</li> </ul>                                                                                                             |
| 2016                 | Sidikou, O. <i>et al.</i> <sup>37</sup> | Survey | Non-specified                                                            | 36  | France | E   | <ul style="list-style-type: none"> <li>Concerns raised about biosimilars in the medical community in the hospital related to infliximab</li> </ul>                                                                                                   | <ul style="list-style-type: none"> <li>Major concerns: pharmaceutical quality, safety (especially immunogenicity), efficacy (particularly in extrapolated indications) and interchangeability with RP</li> </ul>                                                                                              |

|                                                                                                                                                                                                                                                                                                                                                                          |  |  |  |  |  |  |             |  |
|--------------------------------------------------------------------------------------------------------------------------------------------------------------------------------------------------------------------------------------------------------------------------------------------------------------------------------------------------------------------------|--|--|--|--|--|--|-------------|--|
|                                                                                                                                                                                                                                                                                                                                                                          |  |  |  |  |  |  | biosimilars |  |
| A: no declared COI, B: declared author COI (or disclosure of interest) (e.g. HCPs/academics providing advice/paid consultancy to industry), C: industry sponsoring/educational grant from industry to support independent research declared, D: research conducted by industry/lobby organization/consultancy, E: potential funding/COI not specified                    |  |  |  |  |  |  |             |  |
| Anti-TNF: anti- tumour necrosis factor, AOCC: Asian Organization of Crohn's and Colitis, ASBM: Alliance for Safe Biologic Medicines, COI: conflict of interest, ECCO: European Crohn's and Colitis Organization, ESMO: European Society for Medical Oncology, HCP: healthcare professional, IBD: irritable bowel disease, N: number participants, RP: reference products |  |  |  |  |  |  |             |  |

| Table II Knowledge and perceptions of pharmacists about biosimilars: overview of study parameters and main results of relevant literature |                                                 |                    |                                                                                                                                               |                            |                                                                            |                |                                                                                                                                                                                                                                                                          |                                                                                                                                                                                                                                                                                                                                                                      |
|-------------------------------------------------------------------------------------------------------------------------------------------|-------------------------------------------------|--------------------|-----------------------------------------------------------------------------------------------------------------------------------------------|----------------------------|----------------------------------------------------------------------------|----------------|--------------------------------------------------------------------------------------------------------------------------------------------------------------------------------------------------------------------------------------------------------------------------|----------------------------------------------------------------------------------------------------------------------------------------------------------------------------------------------------------------------------------------------------------------------------------------------------------------------------------------------------------------------|
| Year                                                                                                                                      | Authors                                         | Method             | Therapeutic area/specialty                                                                                                                    | N                          | Country/region                                                             | COI/sponsoring | Topics assessed                                                                                                                                                                                                                                                          | Main result(s)/conclusion                                                                                                                                                                                                                                                                                                                                            |
| 2015                                                                                                                                      | Fernandez-Lopez, S. <i>et al.</i> <sup>38</sup> | Survey             | Pharmacists employed by dispensing organizations, managed care organizations, PBMs, consultants, manufacturers/ Non therapeutic area specific | 93                         | US                                                                         | D              | <ul style="list-style-type: none"> <li>Awareness of and comfort level with biosimilars</li> <li>Views on biosimilar naming conventions: impact of identical or different non-proprietary names on confidence levels in substituting interchangeable biologics</li> </ul> | <ul style="list-style-type: none"> <li>Biosimilar naming may influence pharmacists, as majority of participants were most comfortable with biosimilars having the same non-proprietary name as the RP</li> </ul>                                                                                                                                                     |
| 2016                                                                                                                                      | Cogora <sup>39</sup>                            | Survey and AdBoard | Hospital pharmacy/ Non therapeutic area specific                                                                                              | Survey: 200<br>AdBoar d: 7 | Survey: Belgium, France, Germany, Italy, Spain, UK, other non-specified EU | D              | <ul style="list-style-type: none"> <li>Understanding of biosimilars</li> <li>Ability to analyse analytical data relating to biosimilars</li> <li>Needs when communicating</li> </ul>                                                                                     | <ul style="list-style-type: none"> <li>Poor understanding of biosimilar data with e.g. the majority believing there are small differences in the amino acid sequence between biosimilars and RPs</li> <li>Hospital pharmacists found neither analytical nor PK/PD data easy to interpret. Relative to PK/PD data, they find methods to analyse analytical</li> </ul> |

|      |                                             |        |                                                                                                                                                                                                                                                          |                                                                                                  |                                                                                                |                                                                    |                                                                                                                                                                                                                                                                                                                                  |                                                                                                                                                                                                                                                                                                                                                                                                                                                                                |
|------|---------------------------------------------|--------|----------------------------------------------------------------------------------------------------------------------------------------------------------------------------------------------------------------------------------------------------------|--------------------------------------------------------------------------------------------------|------------------------------------------------------------------------------------------------|--------------------------------------------------------------------|----------------------------------------------------------------------------------------------------------------------------------------------------------------------------------------------------------------------------------------------------------------------------------------------------------------------------------|--------------------------------------------------------------------------------------------------------------------------------------------------------------------------------------------------------------------------------------------------------------------------------------------------------------------------------------------------------------------------------------------------------------------------------------------------------------------------------|
|      |                                             |        |                                                                                                                                                                                                                                                          |                                                                                                  | countries/<br>AdBoard:<br>Australia,<br>Brazil,<br>France,<br>Germany,<br>Italy,<br>Mexico, UK |                                                                    | biosimilar data to<br>clinicians <ul style="list-style-type: none"> <li>Survey results<br/>discussed in<br/>advisory board</li> </ul>                                                                                                                                                                                            | attributes and methods to analyse<br>functional attributes even more difficult <ul style="list-style-type: none"> <li>On average, participants didn't find it<br/>easy to communicate biosimilar data to<br/>clinicians</li> </ul>                                                                                                                                                                                                                                             |
| 2016 | Reilly,<br>M.S. <i>et al.</i> <sup>40</sup> | Survey | Hospital and<br>community<br>pharmacy/Non<br>therapeutic area<br>specific                                                                                                                                                                                | 401<br>(60%<br>hospital/<br>health<br>system<br>pharmacy,<br>40%<br>primary<br>care<br>pharmacy) | US                                                                                             | D (ASBM)                                                           | <ul style="list-style-type: none"> <li>Views on labelling<br/>and naming of<br/>biosimilars</li> </ul>                                                                                                                                                                                                                           | <ul style="list-style-type: none"> <li>Majority thought that RPs and<br/>biosimilars should have distinguishable<br/>non-proprietary scientific names and<br/>thought the name should include a<br/>unique suffix</li> </ul>                                                                                                                                                                                                                                                   |
| 2016 | Tomaszewski D. <i>et al.</i> <sup>41</sup>  | Survey | Pharmacists<br>employed by<br>managed care<br>organization,<br>hospital,<br>manufacturer,<br>chain pharmacy,<br>academia,<br>outpatient clinic,<br>specialty<br>pharmacy,<br>independent<br>pharmacy, mail<br>order<br>pharmacy/Haematology,<br>oncology | 781                                                                                              | US                                                                                             | A (funding<br>by AMCP<br>(non-profit<br>pharmacy<br>organization)) | <ul style="list-style-type: none"> <li>Perceptions of<br/>biosimilar naming<br/>conventions and<br/>their impact on<br/>confidence to<br/>dispense biosimilars</li> <li>Perception of<br/>burden created by<br/>laws and regulations<br/>requiring<br/>pharmacists to<br/>complete<br/>postdispense<br/>notifications</li> </ul> | <ul style="list-style-type: none"> <li>Pharmacists preferred to use a non-<br/>proprietary proper name with a<br/>designated suffix</li> <li>Levels of confidence in substituting a<br/>biosimilar for the RP were however<br/>highest when products share the same<br/>non-proprietary name</li> <li>Majority reported perceptions of<br/>increased burden when required to<br/>provide a postdispense notification to<br/>prescribers when dispensing biosimilars</li> </ul> |

|      |                                      |                       |                                                                                                                         |     |                |   |                                                                                                                                                                                                    |                                                                                                                                                                                                                                                                                                                                                                                                                                                                                                                                         |
|------|--------------------------------------|-----------------------|-------------------------------------------------------------------------------------------------------------------------|-----|----------------|---|----------------------------------------------------------------------------------------------------------------------------------------------------------------------------------------------------|-----------------------------------------------------------------------------------------------------------------------------------------------------------------------------------------------------------------------------------------------------------------------------------------------------------------------------------------------------------------------------------------------------------------------------------------------------------------------------------------------------------------------------------------|
|      |                                      |                       | (survey circulated to members of the Academy of Managed Care Pharmacy and the Hematology/Oncology Pharmacy Association) |     |                |   |                                                                                                                                                                                                    |                                                                                                                                                                                                                                                                                                                                                                                                                                                                                                                                         |
| 2017 | Adé, A. <i>et al.</i> <sup>42</sup>  | Survey                | Pharmacy/Non-specified                                                                                                  | 229 | France, Quebec | E | <ul style="list-style-type: none"> <li>Knowledge (differences with generics) and views of biosimilars (nomenclature, immunogenicity management, patient informed consent, substitution)</li> </ul> | <ul style="list-style-type: none"> <li>Pharmacists knew the main differences between generics and biosimilars</li> <li>Key issues on biosimilars: clear nomenclature to avoid confusions, necessity of a list of biosimilar and interchangeable biologic drugs, responsibilities for immunogenicity risk management to be shared between pharmacists and physicians</li> </ul>                                                                                                                                                          |
| 2017 | Beck, M. <i>et al.</i> <sup>43</sup> | Survey                | Hospital and community pharmacy/Non therapeutic area specific                                                           | 802 | France         | B | <ul style="list-style-type: none"> <li>Level of knowledge, experience and opinions regarding biosimilars</li> <li>Perceived problems and solutions to promote prescription</li> </ul>              | <ul style="list-style-type: none"> <li>Low familiarity with biosimilars (half of community pharmacists not at all informed about biosimilars)</li> <li>Questions about the manufacturing process, safety, substitution rules and the international non-proprietary name prescriptions</li> <li>Healthcare cost savings main incentive for biosimilars</li> <li>Main constraints: Patients' wishes to be treated with the RP and indication extrapolation</li> <li>Need for accurate and comprehensive biosimilar information</li> </ul> |
| 2018 | Adé, A. <i>et al.</i> <sup>44</sup>  | Survey pre- and post- | Hospital pharmacy/Non therapeutic area                                                                                  | 58  | Quebec         | E | <ul style="list-style-type: none"> <li>Impact of a training session on pharmacists'</li> </ul>                                                                                                     | <ul style="list-style-type: none"> <li>Significant knowledge improvement on biosimilar regulatory considerations (64% vs. 85%) and on biosimilar</li> </ul>                                                                                                                                                                                                                                                                                                                                                                             |

|      |                                           |                      |                                                                    |      |                      |     |                                                                                                                                |                                                                                                                                                                                                                                                                                                                                                                                                                                                                                                                                |
|------|-------------------------------------------|----------------------|--------------------------------------------------------------------|------|----------------------|-----|--------------------------------------------------------------------------------------------------------------------------------|--------------------------------------------------------------------------------------------------------------------------------------------------------------------------------------------------------------------------------------------------------------------------------------------------------------------------------------------------------------------------------------------------------------------------------------------------------------------------------------------------------------------------------|
|      |                                           | training session     | specific                                                           |      |                      |     | knowledge and views on regulatory and clinical considerations regarding biosimilars                                            | <p>clinical considerations (73% vs. 87%) reported</p> <ul style="list-style-type: none"> <li>After the training session, pharmacists more comfortable to explain what is a biosimilar to a HCP/patient (43% vs. 100%)</li> <li>The training session allowed pharmacists to improve knowledge on biosimilars</li> </ul>                                                                                                                                                                                                         |
| 2019 | Greene, L. <i>et al.</i> <sup>45</sup>    | Survey               | Managed care and specialty pharmacy /Non therapeutic area specific | 300  | US                   | C/D | <ul style="list-style-type: none"> <li>Perceptions regarding strategies to overcome barriers to biosimilar adoption</li> </ul> | <ul style="list-style-type: none"> <li>Positive attitudes about the safety and efficacy of biosimilars</li> <li>Proposed actions: prescriber education about evidence from switching studies, FDA guidance on pharmacy-level substitution</li> <li>Lowest-rated strategies: requiring therapeutic drug monitoring when switching to biosimilars and using quotas to incentivize providers to prescribe biosimilars</li> </ul>                                                                                                  |
| 2019 | Pawlowska, I. <i>et al.</i> <sup>46</sup> | Survey               | Hospital pharmacy/Non therapeutic area specific                    | 61   | Poland               | A   | <ul style="list-style-type: none"> <li>Opinions towards biosimilars and investigate their use in practice</li> </ul>           | <ul style="list-style-type: none"> <li>88% of hospital pharmacists were concerned that biosimilars were not identical with the RP</li> <li>Concerns about immunogenicity (48%) and pharmacokinetic properties (44%)</li> <li>Positive perception about cost effectiveness of biosimilars</li> <li>Pharmacist-led substitution deemed inappropriate</li> <li>Need for more precise legal regulations relating to biosimilars, improved communication between physicians and pharmacists, and educational initiatives</li> </ul> |
| 2019 | Willis, L. <i>et al.</i> <sup>47</sup>    | Survey in context of | Pharmacy/Hematology, oncology                                      | 1023 | Globally distributed | C   | <ul style="list-style-type: none"> <li>Impact of online</li> </ul>                                                             | <ul style="list-style-type: none"> <li>Education initiative led to greater</li> </ul>                                                                                                                                                                                                                                                                                                                                                                                                                                          |

|                                                                                                                                                                                                                                                                                                                                      |  |                              |  |  |        |  |                                                                                                                                                |                                                                                                                                                                                                                    |
|--------------------------------------------------------------------------------------------------------------------------------------------------------------------------------------------------------------------------------------------------------------------------------------------------------------------------------------|--|------------------------------|--|--|--------|--|------------------------------------------------------------------------------------------------------------------------------------------------|--------------------------------------------------------------------------------------------------------------------------------------------------------------------------------------------------------------------|
|                                                                                                                                                                                                                                                                                                                                      |  | edu-<br>cational<br>activity |  |  | survey |  | education on<br>knowledge of the<br>development and<br>regulation of<br>biosimilars, and<br>how to incorporate<br>biosimilars into<br>practice | confidence in pharmacists' ability to<br>incorporate biosimilars into practice <ul style="list-style-type: none"> <li>Foundational and case-based education is recommended to further improve knowledge</li> </ul> |
| A: no declared COI, B: declared author COI (or disclosure of interest) (e.g. HCPs/academics providing advice to industry), C: industry sponsoring/educational grant from industry to support independent research declared, D: research conducted by industry/lobby organization/consultancy, E: potential funding/COI not specified |  |                              |  |  |        |  |                                                                                                                                                |                                                                                                                                                                                                                    |
| AMCP: Academy of Managed Care Pharmacy, Anti-TNF: anti- tumour necrosis factor, ASBM: Alliance for Safe Biologic Medicines, COI: conflict of interest, EFCCA: European Federation of Crohn's and Ulcerative Colitis Association, N: number participants, RP: reference products                                                      |  |                              |  |  |        |  |                                                                                                                                                |                                                                                                                                                                                                                    |

| Table III Knowledge and perceptions of nurses about biosimilars: overview of study parameters and main results of relevant literature                                                                                                                                                                                                                 |                                        |                   |                            |     |                                      |                |                                                                                                                                                |                                                                                                                                                                                                                                                                                                                 |
|-------------------------------------------------------------------------------------------------------------------------------------------------------------------------------------------------------------------------------------------------------------------------------------------------------------------------------------------------------|----------------------------------------|-------------------|----------------------------|-----|--------------------------------------|----------------|------------------------------------------------------------------------------------------------------------------------------------------------|-----------------------------------------------------------------------------------------------------------------------------------------------------------------------------------------------------------------------------------------------------------------------------------------------------------------|
| Year                                                                                                                                                                                                                                                                                                                                                  | Authors                                | Method            | Therapeutic area/specialty | N   | Country/region                       | COI/sponsoring | Topics assessed                                                                                                                                | Main result(s)/conclusion                                                                                                                                                                                                                                                                                       |
| 2016                                                                                                                                                                                                                                                                                                                                                  | Thakur, K. <i>et al.</i> <sup>48</sup> | Survey-interviews | Rheumatology               | 149 | France, Germany, Italy, Spain and UK | D              | <ul style="list-style-type: none"> <li>Perceptions and preferences of the Benepali® autoinjector versus Enbrel MYCLIC® autoinjector</li> </ul> | <ul style="list-style-type: none"> <li>Nurses reported a preference for the Benepali® autoinjector compared with the Enbrel MYCLIC® autoinjector for the majority of attributes assessed</li> <li>Attributes such as 'easy to operate' and 'more intuitive/self-explaining to use' were highly rated</li> </ul> |
| A: no declared COI, B: declared author COI (or disclosure of interest) (e.g. HCPs/academics providing advice/paid consultancy to industry), C: industry sponsoring/educational grant from industry to support independent research declared, D: research conducted by industry/lobby organization/consultancy, E: potential funding/COI not specified |                                        |                   |                            |     |                                      |                |                                                                                                                                                |                                                                                                                                                                                                                                                                                                                 |
| COI: conflict of interest, HCPs: healthcare professionals, N: number participants                                                                                                                                                                                                                                                                     |                                        |                   |                            |     |                                      |                |                                                                                                                                                |                                                                                                                                                                                                                                                                                                                 |

| Table IV Knowledge and perceptions of patients (and caregivers <sup>49</sup> or parents <sup>50</sup> ) about biosimilars: overview of study parameters and main results of relevant literature |                                                 |        |                            |      |                        |                |                                                                                                                                                                                  |                                                                                                                                                                                                                                                                                     |
|-------------------------------------------------------------------------------------------------------------------------------------------------------------------------------------------------|-------------------------------------------------|--------|----------------------------|------|------------------------|----------------|----------------------------------------------------------------------------------------------------------------------------------------------------------------------------------|-------------------------------------------------------------------------------------------------------------------------------------------------------------------------------------------------------------------------------------------------------------------------------------|
| Year                                                                                                                                                                                            | Authors                                         | Method | Therapeutic area/specialty | N    | Country/region         | COI/sponsoring | Topics assessed                                                                                                                                                                  | Main result(s)/conclusion                                                                                                                                                                                                                                                           |
| <b>Gastro-enterology</b>                                                                                                                                                                        |                                                 |        |                            |      |                        |                |                                                                                                                                                                                  |                                                                                                                                                                                                                                                                                     |
| 2016                                                                                                                                                                                            | Attara, G. <i>et al.</i> <sup>49</sup>          | Survey | Gastroenterology           | 423  | Canada                 | E              | <ul style="list-style-type: none"> <li>Perspectives of IBD patients and caregivers regarding biosimilars and how Canadian drug programs will manage these</li> </ul>             | <ul style="list-style-type: none"> <li>Participants (patients and caregivers) were quite familiar with biosimilars</li> <li>Concerns around safety, efficacy, and regulatory process</li> </ul>                                                                                     |
| 2017                                                                                                                                                                                            | Peyrin-Biroulet, L. <i>et al.</i> <sup>51</sup> | Survey | Gastroenterology           | 1181 | Europe (EFCCA members) | C              | <ul style="list-style-type: none"> <li>Patients' perspectives concerning biosimilars (concerns, lower price, extrapolation, interchangeability, naming, substitution)</li> </ul> | <ul style="list-style-type: none"> <li>Most patients not familiar with biosimilars</li> <li>Doubts and concerns about the biosimilars' safety (47%) and efficacy (40.3%)</li> <li>Patients wished to be informed and involved in decision-making concerning biosimilars</li> </ul>  |
| 2017                                                                                                                                                                                            | Pineles, D. <i>et al.</i> <sup>52</sup>         | Survey | Gastroenterology           | 121  | Non-specified          | E              | <ul style="list-style-type: none"> <li>Perceptions and knowledge regarding biosimilars and willingness to switch to biosimilars</li> </ul>                                       | <ul style="list-style-type: none"> <li>Most were uncomfortable using a biosimilar that has not been evaluated in an IBD clinical trial</li> <li>Majority was uncomfortable to switch to a biosimilar</li> </ul>                                                                     |
| 2019                                                                                                                                                                                            | Chelle A.H.-D. <i>et al.</i> <sup>53</sup>      | Survey | Gastroenterology           | 86   | Non-specified          | E              | <ul style="list-style-type: none"> <li>Impact of patient education on the acceptance of a switch from infliximab RP to biosimilar in IBD</li> </ul>                              | <ul style="list-style-type: none"> <li>At baseline, 77% of patients had never heard about biosimilars, 85% were in favour of switching and 61% expressed fears about biosimilar use</li> <li>After education, 84% of patients said they knew about biosimilars, 93% were</li> </ul> |

|                     |                                                 |                                     |                  |      |                        |   |                                                                                                                                                                                               |                                                                                                                                                                                                                                                                                                                               |
|---------------------|-------------------------------------------------|-------------------------------------|------------------|------|------------------------|---|-----------------------------------------------------------------------------------------------------------------------------------------------------------------------------------------------|-------------------------------------------------------------------------------------------------------------------------------------------------------------------------------------------------------------------------------------------------------------------------------------------------------------------------------|
|                     |                                                 |                                     |                  |      |                        |   | patients treated with RP                                                                                                                                                                      | <ul style="list-style-type: none"> <li>in favour of the switch and 39% were still concerned about their use</li> </ul>                                                                                                                                                                                                        |
| 2019                | Coget, E. <i>et al.</i> <sup>54</sup>           | Survey                              | Gastroenterology | 64   | Non-specified          | A | <ul style="list-style-type: none"> <li>Knowledge about infliximab biosimilars and judgement concerning switching to a biosimilar</li> </ul>                                                   | <ul style="list-style-type: none"> <li>Significant lack of knowledge of IBD patients about biosimilars</li> <li>Most patients had a positive perception of biosimilar and accepted a switch after an interview with a clinical pharmacist</li> <li>Patient education about biosimilars needed to organize a switch</li> </ul> |
| 2019                | Haghnejad, V. <i>et al.</i> <sup>55</sup>       | Survey after physician consultation | Gastroenterology | 120  | France                 | B | <ul style="list-style-type: none"> <li>Impact of a gastroenterologist's interview on IBD patients' acceptance for switching from infliximab RP to its biosimilar CT-P13 Inflectra®</li> </ul> | <ul style="list-style-type: none"> <li>Organized information provided to the patient seems to contribute to enhance patient's biosimilar acceptance</li> </ul>                                                                                                                                                                |
| 2019                | Petitdidier, N. <i>et al.</i> <sup>56</sup>     | Survey                              | Gastroenterology | 113  | France                 | B | <ul style="list-style-type: none"> <li>Assessment of patients' perspectives in a prospective manner after switching from infliximab to CT-P13</li> </ul>                                      | <ul style="list-style-type: none"> <li>Patients' perspectives did not change after a switch</li> <li>Patients' concerns about the use of biosimilars and the risks of switching with a significant improvement after switching</li> </ul>                                                                                     |
| 2019                | Peyrin-Biroulet, L. <i>et al.</i> <sup>57</sup> | Survey                              | Gastroenterology | 1619 | Europe (EFCCA members) | C | <ul style="list-style-type: none"> <li>Assessment whether IBD patient perspectives concerning biosimilars have changed since the previous survey<sup>51</sup></li> </ul>                      | <ul style="list-style-type: none"> <li>Many patients with IBD remain unfamiliar with biosimilars</li> <li>Patients have concerns about different aspects regarding biosimilars</li> <li>More confident that biosimilars will impact the management of their disease</li> <li>Patient education is still needed</li> </ul>     |
| <b>Rheumatology</b> |                                                 |                                     |                  |      |                        |   |                                                                                                                                                                                               |                                                                                                                                                                                                                                                                                                                               |

|      |                                           |                   |              |     |                                   |   |                                                                                                                                                                                          |                                                                                                                                                                                                                                                                                                                                                                                                                                                                    |
|------|-------------------------------------------|-------------------|--------------|-----|-----------------------------------|---|------------------------------------------------------------------------------------------------------------------------------------------------------------------------------------------|--------------------------------------------------------------------------------------------------------------------------------------------------------------------------------------------------------------------------------------------------------------------------------------------------------------------------------------------------------------------------------------------------------------------------------------------------------------------|
| 2014 | Berghea, F. <i>et al.</i> <sup>58</sup>   | Focus groups      | Rheumatology | 14  | Non-specified                     | A | <ul style="list-style-type: none"> <li>Knowledge, perceptions and attitudes vis-à-vis biosimilars in potential users (rheumatic patients with and without biological therapy)</li> </ul> | <ul style="list-style-type: none"> <li>Patient's knowledge might be more profound than expected, socio-economic advantages of biosimilars seems to be fully understood</li> <li>Physician should make the choice and assume the responsibilities</li> </ul>                                                                                                                                                                                                        |
| 2014 | Sekhon, S. <i>et al.</i> <sup>59</sup>    | Survey            | Rheumatology | 208 | Canada                            | B | <ul style="list-style-type: none"> <li>Perspectives of patients currently taking RP biologics on biosimilars and the possibility of being switched to them</li> </ul>                    | <ul style="list-style-type: none"> <li>Lack of patient understanding</li> <li>Patients hesitant to use biosimilars that are not tested in a North American population</li> <li>Patients value their physicians' opinions</li> </ul>                                                                                                                                                                                                                                |
| 2016 | Thakur, K. <i>et al.</i> <sup>60</sup>    | Survey-interviews | Rheumatology | 220 | France, Germany, Italy, Spain, UK | D | <ul style="list-style-type: none"> <li>Patients' perceptions and preferences of the Benepali® autoinjector versus the Enbrel MYCLIC® autoinjector</li> </ul>                             | <ul style="list-style-type: none"> <li>Patients reported a preference for the Benepali® autoinjector compared to the Enbrel MYCLIC® autoinjector</li> </ul>                                                                                                                                                                                                                                                                                                        |
| 2017 | Aladul, M.I., <i>et al.</i> <sup>61</sup> | Survey            | Rheumatology | 182 | UK                                | A | <ul style="list-style-type: none"> <li>Knowledge and attitudes towards infliximab and etanercept biosimilars</li> </ul>                                                                  | <ul style="list-style-type: none"> <li>Participants had a good knowledge and understanding of biosimilars</li> <li>Participants on biosimilars were confident and positive about biosimilars' safety, efficacy and switching</li> <li>Participants on RPs more reluctant to switch to biosimilars. More clinical trials on switching, better communication and reassurance by HCPs, further involvement in decision making would increase acceptance of</li> </ul> |

|      |                                                  |                                                          |              |     |               |   |                                                                                                                                                                                                                          |                                                                                                                                                                                                                                                                                                                                                                                                                          |
|------|--------------------------------------------------|----------------------------------------------------------|--------------|-----|---------------|---|--------------------------------------------------------------------------------------------------------------------------------------------------------------------------------------------------------------------------|--------------------------------------------------------------------------------------------------------------------------------------------------------------------------------------------------------------------------------------------------------------------------------------------------------------------------------------------------------------------------------------------------------------------------|
|      |                                                  |                                                          |              |     |               |   |                                                                                                                                                                                                                          | biosimilars                                                                                                                                                                                                                                                                                                                                                                                                              |
| 2018 | Kovitwanichkanont T. <i>et al.</i> <sup>62</sup> | Survey                                                   | Rheumatology | 127 | Australia     | A | <ul style="list-style-type: none"> <li>Awareness and attitudes to biosimilars</li> </ul>                                                                                                                                 | <ul style="list-style-type: none"> <li>Despite being unfamiliar with biosimilars, most patients would be comfortable taking biosimilars if recommended by their physician</li> <li>+1/4 were worried about unrecognised switching</li> </ul>                                                                                                                                                                             |
| 2019 | Claudia, C. <i>et al.</i> <sup>63</sup>          | Survey                                                   | Rheumatology | 336 | Romania       | B | <ul style="list-style-type: none"> <li>Knowledge and concerns on biosimilars</li> <li>Expectations when receiving a biosimilar following the principle of shared-decision making</li> </ul>                              | <ul style="list-style-type: none"> <li>Still a significant information gap concerning biosimilars among patients</li> <li>Most concerns about the occurrence of adverse events</li> <li>A need to improve patient education on biosimilars</li> <li>Most patients rely entirely on their physician for prescribing the most appropriate product (indicating that shared-decision principle is more of a myth)</li> </ul> |
| 2019 | Frantzen, L. <i>et al.</i> <sup>64</sup>         | Survey                                                   | Rheumatology | 629 | France        | A | <ul style="list-style-type: none"> <li>Patients' information about biosimilars and patients' incentives and deterrents to concur with the use of biosimilars</li> </ul>                                                  | <ul style="list-style-type: none"> <li>Biosimilars largely unknown to patients</li> <li>Information needed to improve patients' adherence to biosimilars and avoid a nocebo effect</li> </ul>                                                                                                                                                                                                                            |
| 2019 | Petit, J. <i>et al.</i> <sup>65</sup>            | Semi-directive interviews as part of educational program | Rheumatology | 5   | Non-specified | A | <ul style="list-style-type: none"> <li>Efficacy of a multidisciplinary team intervention to reduce the nocebo effect among inflammatory arthritis patients with systematic switch infliximab RP to biosimilar</li> </ul> | <ul style="list-style-type: none"> <li>Fears about efficacy and tolerability, need for information, importance of sharing experience of AE with HCPs, having the opportunity to switch back</li> <li>A multidisciplinary patient education team where nurses have a prominent role is effective in reducing the nocebo effect when switching from RP to biosimilar</li> </ul>                                            |

|                    |                                             |                                     |              |     |               |   |                                                                                                                                                                               |                                                                                                                                                                                                                                                                                                                                                                                                                                                                                                                                                                                                       |
|--------------------|---------------------------------------------|-------------------------------------|--------------|-----|---------------|---|-------------------------------------------------------------------------------------------------------------------------------------------------------------------------------|-------------------------------------------------------------------------------------------------------------------------------------------------------------------------------------------------------------------------------------------------------------------------------------------------------------------------------------------------------------------------------------------------------------------------------------------------------------------------------------------------------------------------------------------------------------------------------------------------------|
|                    |                                             |                                     |              |     |               |   | infliximab (SB2)                                                                                                                                                              |                                                                                                                                                                                                                                                                                                                                                                                                                                                                                                                                                                                                       |
| 2019               | Renton, W.D. <i>et al.</i> <sup>50</sup>    | Interviews                          | Rheumatology | 9   | UK            | A | <ul style="list-style-type: none"> <li>• Patient and parent perceptions on non-medical biosimilar switching</li> </ul>                                                        | <ul style="list-style-type: none"> <li>• Paediatric patients and parents</li> <li>• Concerns: device type, colour of medication and device, if injections would sting more</li> <li>• Most families felt that there would be no significant difference in safety/efficacy</li> </ul>                                                                                                                                                                                                                                                                                                                  |
| 2019               | Robinson, S. <i>et al.</i> <sup>66</sup>    | Survey (informed by two interviews) | Rheumatology | 26  | Non-specified | A | <ul style="list-style-type: none"> <li>• Optimal level of explanation, education and consent regarding switching</li> <li>• Experience of the process of switching</li> </ul> | <ul style="list-style-type: none"> <li>• General satisfaction with the switch process (letter prior to switch, appointment offered with specialist nurse, possibility to return to RP if necessary assured to patients)</li> <li>• Minority of patients dissatisfied and wanted more information</li> <li>• New side effects not a major problem, but perceived change in efficacy was</li> <li>• A substantial minority of patients would like to return to the RP</li> <li>• Support from the rheumatology service needs to be more available and patients should be empowered to use it</li> </ul> |
| 2019               | Scherlinger, M. <i>et al.</i> <sup>67</sup> | Interview as part of switch program | Rheumatology | 52  | France        | B | <ul style="list-style-type: none"> <li>• Acceptance rate and factors influencing acceptance of the switch from RP etanercept to biosimilars SB4</li> </ul>                    | <ul style="list-style-type: none"> <li>• Main questions about similarity in efficacy and safety</li> <li>• Many patients asked about the switch experience of other patients</li> <li>• The majority reported a good switch experience</li> </ul>                                                                                                                                                                                                                                                                                                                                                     |
| <b>Dermatology</b> |                                             |                                     |              |     |               |   |                                                                                                                                                                               |                                                                                                                                                                                                                                                                                                                                                                                                                                                                                                                                                                                                       |
| 2018               | Azevedo, A. <i>et al.</i> <sup>68</sup>     | Survey                              | Dermatology  | 108 | Portugal      | B | <ul style="list-style-type: none"> <li>• Perspective on biosimilars (general opinion, regarding switching, extrapolation, price</li> </ul>                                    | <ul style="list-style-type: none"> <li>• 70.4% did not know the definition of a biosimilar</li> <li>• Nearly 80% partially/totally agreed in using a biosimilar in order to reduce healthcare costs</li> </ul>                                                                                                                                                                                                                                                                                                                                                                                        |

|                      |                                                |        |               |      |               |   |                                                                                                                                                                                                            |                                                                                                                                                                                                                                                                                                                                                                                  |
|----------------------|------------------------------------------------|--------|---------------|------|---------------|---|------------------------------------------------------------------------------------------------------------------------------------------------------------------------------------------------------------|----------------------------------------------------------------------------------------------------------------------------------------------------------------------------------------------------------------------------------------------------------------------------------------------------------------------------------------------------------------------------------|
|                      |                                                |        |               |      |               |   | difference)                                                                                                                                                                                                | <ul style="list-style-type: none"> <li>Lack of studies in the European population and in psoriatic patients led most of the patients to somewhat/completely oppose to the use of biosimilars</li> </ul>                                                                                                                                                                          |
| 2018                 | Ighani, A. <i>et al.</i> <sup>69</sup>         | Survey | Dermatology   | 343  | Canada        | C | <ul style="list-style-type: none"> <li>Understanding and perceptions of biosimilars in patients, who were using either biologic therapies or nonbiologic therapies, and compare their responses</li> </ul> | <ul style="list-style-type: none"> <li>Approximately 33.5% of biologic users were very/somewhat familiar with biosimilars</li> <li>Most patients would be very/somewhat concerned if the government or insurance companies could dictate which biologic to prescribe</li> </ul>                                                                                                  |
| <b>Endocrinology</b> |                                                |        |               |      |               |   |                                                                                                                                                                                                            |                                                                                                                                                                                                                                                                                                                                                                                  |
| 2014                 | Wilkins, R. <i>et al.</i> <sup>70</sup>        | Survey | Endocrinology | 3214 | Non-specified | D | <ul style="list-style-type: none"> <li>Willingness to switch to a hypothetical less expensive insulin biosimilar</li> </ul>                                                                                | <ul style="list-style-type: none"> <li>Majority of patients willing to consider biosimilar insulines</li> <li>Type 2 diabetes patients demonstrated slightly more willingness to use biosimilars than type 1 diabetes patients</li> <li>Common patient concerns: efficacy and side effects of biosimilar compared to reference product, design of the delivery device</li> </ul> |
| 2019                 | Leonardi Reyes, F. <i>et al.</i> <sup>71</sup> | DCE    | Endocrinology | 200  | Columbia      | E | <ul style="list-style-type: none"> <li>Relative importance patients place on potential features of injectable osteoporosis treatments</li> </ul>                                                           | <ul style="list-style-type: none"> <li>Patients expressed a strong preference for RPs for osteoporosis over biosimilar osteoporosis products, even when efficacy and safety between the two were assumed to be the same</li> </ul>                                                                                                                                               |
| 2019                 | Malassigne, M. <i>et al.</i> <sup>72</sup>     | Survey | Endocrinology | 54   | Non-specified | A | <ul style="list-style-type: none"> <li>Knowledge of diabetic patients concerning their therapy by insulin</li> </ul>                                                                                       | <ul style="list-style-type: none"> <li>Lack of patients' knowledge and information concerning insulin therapy and biosimilars</li> <li>Pharmaceutical interviews can improve</li> </ul>                                                                                                                                                                                          |

|                                   |                                             |                                    |                                             |                                          |               |   |                                                                                                                                                                                                                                                                                  |                                                                                                                                                                                                                                                                                                                                                                     |
|-----------------------------------|---------------------------------------------|------------------------------------|---------------------------------------------|------------------------------------------|---------------|---|----------------------------------------------------------------------------------------------------------------------------------------------------------------------------------------------------------------------------------------------------------------------------------|---------------------------------------------------------------------------------------------------------------------------------------------------------------------------------------------------------------------------------------------------------------------------------------------------------------------------------------------------------------------|
|                                   |                                             |                                    |                                             |                                          |               |   | glargine <ul style="list-style-type: none"> <li>Impact of a pharmaceutical interview on insulin glargine biosimilar patient acceptance</li> </ul>                                                                                                                                | the acceptance of biosimilars switch                                                                                                                                                                                                                                                                                                                                |
| <b>Oncology</b>                   |                                             |                                    |                                             |                                          |               |   |                                                                                                                                                                                                                                                                                  |                                                                                                                                                                                                                                                                                                                                                                     |
| 2019                              | Harvey, R.D. <i>et al.</i> <sup>73</sup>    | Survey                             | Oncology                                    | 79                                       | Non-specified | E | <ul style="list-style-type: none"> <li>Views on biosimilars and their potential to reduce costs</li> </ul>                                                                                                                                                                       | <ul style="list-style-type: none"> <li>Most patients agree that cheaper medications work as well as more expensive ones</li> <li>Concerns among some patients that drug price may be a proxy for quality</li> </ul>                                                                                                                                                 |
| 2019                              | Ismailov, R.M., <i>et al.</i> <sup>74</sup> | Survey                             | Oncology                                    | 79                                       | Colorado, US  | E | <ul style="list-style-type: none"> <li>Patient knowledge and awareness of biosimilars</li> </ul>                                                                                                                                                                                 | <ul style="list-style-type: none"> <li>Good level of knowledge and awareness of major topics concerning biosimilars</li> </ul>                                                                                                                                                                                                                                      |
| <b>Multiple therapeutic areas</b> |                                             |                                    |                                             |                                          |               |   |                                                                                                                                                                                                                                                                                  |                                                                                                                                                                                                                                                                                                                                                                     |
| 2017                              | Badley, E. <i>et al.</i> <sup>75</sup>      | Focus groups and survey            | Rheumatology, dermatology, gastroenterology | 44                                       | Canada        | E | <ul style="list-style-type: none"> <li>Perspectives on transitioning to a different biologic, including biosimilars</li> <li>Information and resource needs of patients that would support them in taking an active and informed role in biologic treatment decisions</li> </ul> | <ul style="list-style-type: none"> <li>Most participants only somewhat/not very confident in their knowledge of biosimilars and noted the need for credible information</li> <li>About 50% were somewhat/very comfortable with switch to a biosimilar if approved by their physician</li> <li>Most expected their physician to lead medication decisions</li> </ul> |
| 2018                              | Baudrant M. <i>et al.</i> <sup>76</sup>     | Survey, semi-structured interviews | Gastroenterology, rheumatology              | 76 IBD, 25 rheum. and 5 internal medicin | Non-specified | E | <ul style="list-style-type: none"> <li>Patient willingness to switch</li> </ul>                                                                                                                                                                                                  | <ul style="list-style-type: none"> <li>Almost 90% of IBD patients had never heard of biosimilars</li> <li>56.6% would agree to switch</li> <li>Main switch fear: loss of efficiency, they had a need for peer's feedback/to</li> </ul>                                                                                                                              |

|                                                       |                                                     |        |                                             |                                                                                              |        |   |                                                                                                                                                                                                        |                                                                                                                                                                                                                                                                                                                                                                                       |
|-------------------------------------------------------|-----------------------------------------------------|--------|---------------------------------------------|----------------------------------------------------------------------------------------------|--------|---|--------------------------------------------------------------------------------------------------------------------------------------------------------------------------------------------------------|---------------------------------------------------------------------------------------------------------------------------------------------------------------------------------------------------------------------------------------------------------------------------------------------------------------------------------------------------------------------------------------|
|                                                       |                                                     |        |                                             | e                                                                                            |        |   |                                                                                                                                                                                                        | <ul style="list-style-type: none"> <li>be convinced by the specialist</li> <li>• Patient discussion seems necessary to reduce the “nocebo effect”</li> </ul>                                                                                                                                                                                                                          |
| 2019                                                  | Teeple, A. <i>et al.</i> <sup>77</sup>              | Survey | Rheumatology, dermatology, gastroenterology | 1696                                                                                         | US     | D | <ul style="list-style-type: none"> <li>• Attitudes regarding non-medical switching to biosimilars among patients with autoimmune disease receiving a biologic</li> </ul>                               | <ul style="list-style-type: none"> <li>• 85% of patients concerned that biosimilars wouldn't treat their disease as well</li> <li>• 85% didn't want to switch to a biosimilar, 83% were concerned that switching may cause more side-effects</li> </ul>                                                                                                                               |
| <b>Non therapeutic area specific or non-specified</b> |                                                     |        |                                             |                                                                                              |        |   |                                                                                                                                                                                                        |                                                                                                                                                                                                                                                                                                                                                                                       |
| 2017                                                  | Wong-Rieger, D. <i>et al.</i> <sup>78</sup>         | Survey | Non therapeutic area specific               | 2000 (sent to 2000 patients representing multiple diseases, +-200 had exposure to biologics) | Canada | E | <ul style="list-style-type: none"> <li>• How naive and “informed” patients feel about biosimilar usage</li> </ul>                                                                                      | <ul style="list-style-type: none"> <li>• More than 40% reported no previous knowledge about biosimilars</li> <li>• 78% objected to switching with most opposition from naive patients</li> <li>• Oncology patients objected most to approval based on extrapolation</li> <li>• Patients reluctant to switch with implications for adherence to and confidence in their use</li> </ul> |
| 2018                                                  | Cvancarova Smastuen, M. <i>et al.</i> <sup>79</sup> | Survey | Non-specified                               | 290                                                                                          | Norway | C | <ul style="list-style-type: none"> <li>• Patients' experiences regarding being switched to an alternative medication</li> <li>• Possible associations between switching and health literacy</li> </ul> | <ul style="list-style-type: none"> <li>• Majority reported to be satisfied with being switched to a cheaper biosimilar medication (1/5 however reported being dissatisfied)</li> <li>• Patients' attitudes and level of satisfaction are associated with being given sufficient and necessary information concerning their health</li> </ul>                                          |

|                                                                                                                                                                                                                                                                                                                                                |                                              |        |               |     |               |   |                                                                                                                                                                               |                                                                                                                                                                                                                                                                |
|------------------------------------------------------------------------------------------------------------------------------------------------------------------------------------------------------------------------------------------------------------------------------------------------------------------------------------------------|----------------------------------------------|--------|---------------|-----|---------------|---|-------------------------------------------------------------------------------------------------------------------------------------------------------------------------------|----------------------------------------------------------------------------------------------------------------------------------------------------------------------------------------------------------------------------------------------------------------|
| 2019                                                                                                                                                                                                                                                                                                                                           | Barbosa, C.M.-M. <i>et al.</i> <sup>80</sup> | Survey | Non-specified | 134 | Non-specified | E | <ul style="list-style-type: none"> <li>• Patient satisfaction after pharmacy-mediated replacement of etanercept RP prefilled syringe with biosimilar prefilled pen</li> </ul> | <ul style="list-style-type: none"> <li>• The change from RP etanercept to biosimilar product was acceptable for most patients</li> <li>• Mean overall satisfaction was higher among men, younger patients and those with shorter treatment duration</li> </ul> |
| A: no declared COI, B: declared COI (or disclosure of interest) (e.g. HCPs/academics providing advice/paid consultancy to industry), C: industry sponsoring/educational grant from industry to support independent research declared, D: research conducted by industry/lobby organization/consultancy, E: potential funding/COI not specified |                                              |        |               |     |               |   |                                                                                                                                                                               |                                                                                                                                                                                                                                                                |
| COI: conflict of interest, EFCCA: European Federation of Crohn's and Ulcerative Colitis Association, HCPs: healthcare professionals, IBD: irritable bowel disease, N: number participants, RP: reference products                                                                                                                              |                                              |        |               |     |               |   |                                                                                                                                                                               |                                                                                                                                                                                                                                                                |

| Table V Overview of study parameters and main results of papers regarding knowledge and perceptions elicited in various stakeholder groups |                                          |          |                                                          |                            |                                                                                          |                |             |                                                                                                                                                                                                                                                    |                                                                                                                                                                                                                                                                                                                                                                                                                                              |
|--------------------------------------------------------------------------------------------------------------------------------------------|------------------------------------------|----------|----------------------------------------------------------|----------------------------|------------------------------------------------------------------------------------------|----------------|-------------|----------------------------------------------------------------------------------------------------------------------------------------------------------------------------------------------------------------------------------------------------|----------------------------------------------------------------------------------------------------------------------------------------------------------------------------------------------------------------------------------------------------------------------------------------------------------------------------------------------------------------------------------------------------------------------------------------------|
| Year                                                                                                                                       | Authors                                  | Method   | Stakeholder(s)                                           | Therapeutic area/specialty | N                                                                                        | Country/region | COI/funding | Topics assessed                                                                                                                                                                                                                                    | Main result(s)/conclusion                                                                                                                                                                                                                                                                                                                                                                                                                    |
| <b>Gastro-enterology</b>                                                                                                                   |                                          |          |                                                          |                            |                                                                                          |                |             |                                                                                                                                                                                                                                                    |                                                                                                                                                                                                                                                                                                                                                                                                                                              |
| 2017                                                                                                                                       | Sullivan, E. <i>et al.</i> <sup>81</sup> | Survey   | Physicians and patients                                  | Gastroenterology           | 25 physicians, 136 patients                                                              | Germany        | D           | <ul style="list-style-type: none"> <li>Gastro-enterologists' motivation for prescribing biosimilars</li> <li>Gastro-enterologists' treatment preferences in relation to prescribing behaviour</li> <li>Patient attitudes to biosimilars</li> </ul> | <ul style="list-style-type: none"> <li>&gt;80% of gastroenterologists would prescribe a RP rather than biosimilar as 1st line therapy if unrestricted</li> <li>Patients showed some reluctance to accept biosimilars, although of those receiving biosimilars, 79% were satisfied with the current treatment</li> <li>Mentioned concerns: potential side effects, potential long-term problems, not knowing enough about the drug</li> </ul> |
| 2019                                                                                                                                       | D'Amico, F. <i>et al.</i> <sup>82</sup>  | Workshop | Physicians, nurses, psychologists, pharmacists, patients | Gastroenterology           | 7 physicians, 2 pharmacists, 1 methodologist, 1 psychologist, 1 nurse, 1 member of EFCCA | Europe         | C           | <ul style="list-style-type: none"> <li>Viewpoints from the perspective of physicians, nurses, psychologists, pharmacists and patients</li> </ul>                                                                                                   | <ul style="list-style-type: none"> <li>Reducing the nocebo effect requires a multidisciplinary team-effort</li> <li>Needed: improved knowledge about biosimilars and nocebo effect in HCPs and patients. Enhanced</li> </ul>                                                                                                                                                                                                                 |

|                     |                                           |            |                       |                  |                          |                        |   |                                                                                                                                                                                                                 |                                                                                                                                                                                                                                                                   |
|---------------------|-------------------------------------------|------------|-----------------------|------------------|--------------------------|------------------------|---|-----------------------------------------------------------------------------------------------------------------------------------------------------------------------------------------------------------------|-------------------------------------------------------------------------------------------------------------------------------------------------------------------------------------------------------------------------------------------------------------------|
|                     |                                           |            |                       |                  |                          |                        |   |                                                                                                                                                                                                                 | communication when transferring information to patients or HCPs                                                                                                                                                                                                   |
| 2019                | Fenwick, S. <i>et al.</i> <sup>83</sup>   | Survey     | Nurses and patients   | Gastroenterology | 101 nurses, 151 patients | UK and Germany         | D | <ul style="list-style-type: none"> <li>Patients' and nurses' preferences for the Imraldi® versus Humira® or Enbrel MyClic® autoinjectors</li> </ul>                                                             | <ul style="list-style-type: none"> <li>Nurses and patients preferred the Imraldi® autoinjector over the Humira® and Enbrel MyClic® autoinjectors</li> <li>Considerations: ease of use, ease of grip, button-free initiation mechanism</li> </ul>                  |
| <b>Rheumatology</b> |                                           |            |                       |                  |                          |                        |   |                                                                                                                                                                                                                 |                                                                                                                                                                                                                                                                   |
| 2014                | Sewak, N.P.S. <i>et al.</i> <sup>84</sup> | Interviews | KOLs and payers       | Rheumatology     | Non-specified            | France, Germany, Italy | E | <ul style="list-style-type: none"> <li>How stakeholders perceived the introduction of anti-TNFs biosimilars</li> </ul>                                                                                          | <ul style="list-style-type: none"> <li>KOLs want to treat more patients within the same budget</li> <li>Treatment naïve patients are considered most suitable for anti-TNF biosimilars</li> <li>Automatic substitution not favoured by any respondents</li> </ul> |
| 2014                | White, R. <i>et al.</i> <sup>85</sup>     | Interviews | Physicians and payers | Rheumatology     | 14 physicians, 6 payers  | EU                     | E | <ul style="list-style-type: none"> <li>Expectations of biosimilars</li> <li>How biosimilars can influence payer and physician decision-making</li> <li>What must manufacturers do to achieve success</li> </ul> | <ul style="list-style-type: none"> <li>Awareness of biosimilars amongst physicians was low</li> <li>35% of physicians indicated to consider prescribing biosimilars for RA within one year of launch</li> </ul>                                                   |

|      |                                             |                                                  |                                                                      |              |                                                                                 |         |   |                                                                                                                                                                                                                                                                 |                                                                                                                                                                                                                                                                                                                                     |
|------|---------------------------------------------|--------------------------------------------------|----------------------------------------------------------------------|--------------|---------------------------------------------------------------------------------|---------|---|-----------------------------------------------------------------------------------------------------------------------------------------------------------------------------------------------------------------------------------------------------------------|-------------------------------------------------------------------------------------------------------------------------------------------------------------------------------------------------------------------------------------------------------------------------------------------------------------------------------------|
| 2016 | Piercy, J. <i>et al.</i> <sup>86</sup>      | Survey                                           | Patients and physicians                                              | Rheumatology | 261 patients, 50 physicians                                                     | Germany | D | <ul style="list-style-type: none"> <li>• Satisfaction, understanding, attitudes towards being prescribed biosimilars or RPs</li> <li>• Rheumatologists reported matching data on patients who completed the survey</li> </ul>                                   | <ul style="list-style-type: none"> <li>• Biosimilar treated patients less satisfied that their current treatment was controlling their condition than RP treated patients and had lower treatment understanding</li> </ul>                                                                                                          |
| 2017 | Funahashi, K. <i>et al.</i> <sup>87</sup>   | Survey                                           | Patients and physicians                                              | Rheumatology | 4151 patients, 32 physicians                                                    | Japan   | A | <ul style="list-style-type: none"> <li>• Knowledge regarding biosimilars</li> <li>• Interest in or experience with using biosimilars</li> <li>• Physicians: about experience of biosimilars and future plans for use, conditions of biosimilar usage</li> </ul> | <ul style="list-style-type: none"> <li>• 13% of patients knew about biosimilars, 63% would rely on their physician's judgement regarding choosing biosimilars</li> <li>• 60% of physicians replied that they plan to use biosimilars to be released in the future if regular and detailed safety information is received</li> </ul> |
| 2017 | Jorgensen, T.S. <i>et al.</i> <sup>88</sup> | Workshops and interviews as part of Parker model | Patients, physicians, nurses, medical secretary, public stakeholders | Rheumatology | 16 patients, 2 physicians, 2 nurses, 1 medical secretary, 4 public stakeholders | Denmark | B | <ul style="list-style-type: none"> <li>• Impact of performing a non-medical switch from etanercept originator to a biosimilar</li> </ul>                                                                                                                        | <ul style="list-style-type: none"> <li>• Implementing a switch involves dialogue and clear communication combined with logistic and background info to all stakeholders</li> </ul>                                                                                                                                                  |
| 2017 | Radtchenko, J. <i>et al.</i> <sup>89</sup>  | Survey                                           | Physicians and practice managers                                     | Rheumatology | 24 physicians, 20 practice managers                                             | US      | A | <ul style="list-style-type: none"> <li>• Perceptions to identify areas of opportunity to</li> </ul>                                                                                                                                                             | <ul style="list-style-type: none"> <li>• 51% understood the concept of interchangeability</li> </ul>                                                                                                                                                                                                                                |

|      |                                                |        |                         |              |                                |         |   |                                                                                                                                                        |                                                                                                                                                                                                                                                                                                                                                                                                                         |
|------|------------------------------------------------|--------|-------------------------|--------------|--------------------------------|---------|---|--------------------------------------------------------------------------------------------------------------------------------------------------------|-------------------------------------------------------------------------------------------------------------------------------------------------------------------------------------------------------------------------------------------------------------------------------------------------------------------------------------------------------------------------------------------------------------------------|
|      |                                                |        |                         |              |                                |         |   | support<br>biosimilar<br>adoption                                                                                                                      | between biosimilars<br>and RPs <ul style="list-style-type: none"> <li>• 76% unaware of compatibility requirements for RPs after a manufacturing change</li> <li>• Only 40% believed biosimilars match safety and efficacy of RP</li> </ul>                                                                                                                                                                              |
| 2017 | van Overbeek e, E. <i>et al.</i> <sup>90</sup> | Survey | Physicians and patients | Rheumatology | 41 physicians and 121 patients | Belgium | B | <ul style="list-style-type: none"> <li>• Knowledge and perception</li> <li>• Factors that influence choice</li> <li>• Switch considerations</li> </ul> | <ul style="list-style-type: none"> <li>• Rheumatologists convinced that there can be differences between RPs and biosimilars, questioning the safety and efficacy of biosimilars</li> <li>• Physician concerns about interchangeability and extrapolation of indications</li> <li>• Safety as major concern of patients</li> <li>• Patients trust in physician's decision to start or switch to a biosimilar</li> </ul> |
| 2017 | Waller, J. <i>et al.</i> <sup>91</sup>         | Survey | Physicians and patients | Rheumatology | 50 physicians, 261 patients    | Germany | D | <ul style="list-style-type: none"> <li>• Physician motivation for prescribing biosimilars</li> <li>• Physician treatment</li> </ul>                    | <ul style="list-style-type: none"> <li>• Reluctance from patients to accept biosimilars</li> <li>• Need to educate patients and rheumatologists who</li> </ul>                                                                                                                                                                                                                                                          |

|      |                                          |        |                                                  |              |                                           |               |   |                                                                                                                                                             |                                                                                                                                                                                                                                                                                                                                                                                                                      |
|------|------------------------------------------|--------|--------------------------------------------------|--------------|-------------------------------------------|---------------|---|-------------------------------------------------------------------------------------------------------------------------------------------------------------|----------------------------------------------------------------------------------------------------------------------------------------------------------------------------------------------------------------------------------------------------------------------------------------------------------------------------------------------------------------------------------------------------------------------|
|      |                                          |        |                                                  |              |                                           |               |   | <ul style="list-style-type: none"> <li>preferences in relation to prescribing behaviour</li> <li>• Patient attitudes to biosimilars</li> </ul>              | <ul style="list-style-type: none"> <li>are unsure</li> <li>• Cost and desire for experience are factors driving physicians to prescribe biosimilars</li> </ul>                                                                                                                                                                                                                                                       |
| 2018 | Marona, J. <i>et al.</i> <sup>92</sup>   | Survey | Physicians and patients                          | Rheumatology | 51 physicians, 22 patients                | Non-specified | A | <ul style="list-style-type: none"> <li>• Perspectives concerning biosimilars in the context of non-medical switch</li> </ul>                                | <ul style="list-style-type: none"> <li>• All considered to be at least reasonably informed</li> <li>• Almost half had only a mild/ moderate confidence in the switching process</li> <li>• Patients' main worries about switching were safety and efficacy. Most were at least moderately confident about biosimilars' efficacy and safety, most didn't change the degree of satisfaction after switching</li> </ul> |
| 2018 | Robinson, K. <i>et al.</i> <sup>93</sup> | Survey | Physicians, pharmacists, patient representatives | Rheumatology | 598 providers, 17 patient representatives | US            | A | <ul style="list-style-type: none"> <li>• Knowledge of and attitudes towards biosimilars</li> <li>• Persisting gaps towards enhanced patient care</li> </ul> | <ul style="list-style-type: none"> <li>• 49% of HCPs indicated that they have fair/poor knowledge about differences between biosimilars and RPs, 66% lacked knowledge of the regulatory pathway for biosimilars</li> <li>• 78% of physicians report willingness to prescribe biosimilars</li> <li>• Greatest concern</li> </ul>                                                                                      |

|                              |                                            |                                                     |                                 |                       |                                                  |     |                                      |                                                                                                                                                                                                                      |                                                                                                                                                                                                                                                                                                                                                                                                                                 |
|------------------------------|--------------------------------------------|-----------------------------------------------------|---------------------------------|-----------------------|--------------------------------------------------|-----|--------------------------------------|----------------------------------------------------------------------------------------------------------------------------------------------------------------------------------------------------------------------|---------------------------------------------------------------------------------------------------------------------------------------------------------------------------------------------------------------------------------------------------------------------------------------------------------------------------------------------------------------------------------------------------------------------------------|
|                              |                                            |                                                     |                                 |                       |                                                  |     |                                      |                                                                                                                                                                                                                      | among patients: being forced to switch due to payer restrictions                                                                                                                                                                                                                                                                                                                                                                |
| <b>Oncology, haematology</b> |                                            |                                                     |                                 |                       |                                                  |     |                                      |                                                                                                                                                                                                                      |                                                                                                                                                                                                                                                                                                                                                                                                                                 |
| 2015                         | Gardiner, R.B. <i>et al.</i> <sup>94</sup> | Interviews and focus groups                         | Budget holders and physicians   | Oncology              | Non-specified                                    | EU5 | E                                    | <ul style="list-style-type: none"> <li>How budget holders and clinicians perceive the incoming oncology biosimilar mAbs</li> </ul>                                                                                   | <ul style="list-style-type: none"> <li>Physicians apprehensive of biosimilar mAbs</li> </ul>                                                                                                                                                                                                                                                                                                                                    |
| 2017                         | McCarthy, T. <i>et al.</i> <sup>95</sup>   | Survey pre- and post-education and training package | Nurses, pharmacists             | Haematology, oncology | > 100 participants                               | UK  | C (Cancer Vanguard Pharma Challenge) | <ul style="list-style-type: none"> <li>Concerns of key stakeholders</li> <li>Materials to assist NHS trusts in safe and timely biosimilars adoption</li> <li>Impact of training on biosimilar perceptions</li> </ul> | <ul style="list-style-type: none"> <li>Significant improvement in understanding of the concept of biosimilars following the training</li> <li>Areas agreed to focus on included adoption timeline tool, Trust Policy Template, web-based interactive training package, Q&amp;A document, patient information leaflet</li> <li>The project highlighted the benefits of pharma industry and NHS working collaborations</li> </ul> |
| 2017                         | Murphy, P. <i>et al.</i> <sup>96</sup>     | Survey in education program                         | Pharmacists, nurses, physicians | Haematology, oncology | 130 (46% pharmacists, 48% nurses, 6% physicians) | UK  | C (Cancer Vanguard Pharma Challenge) | <ul style="list-style-type: none"> <li>Development and validation of an education programme that addresses knowledge gaps in biosimilarity</li> </ul>                                                                | <ul style="list-style-type: none"> <li>Biosimilar understanding amongst HCPs in hemato-oncology is highly variable</li> <li>Training demonstrated to significantly improve</li> </ul>                                                                                                                                                                                                                                           |

|                                   |                                        |                       |                                                      |                              |                                                                   |        |   |                                                                                                                                                                                                                                   |                                                                                                                                                                                                                                            |
|-----------------------------------|----------------------------------------|-----------------------|------------------------------------------------------|------------------------------|-------------------------------------------------------------------|--------|---|-----------------------------------------------------------------------------------------------------------------------------------------------------------------------------------------------------------------------------------|--------------------------------------------------------------------------------------------------------------------------------------------------------------------------------------------------------------------------------------------|
|                                   |                                        |                       |                                                      |                              |                                                                   |        |   |                                                                                                                                                                                                                                   | participants understanding and confidence in biosimilars                                                                                                                                                                                   |
| 2019                              | Cook, J.W. <i>et al.</i> <sup>97</sup> | Survey and interviews | Physicians, pharmacists, advanced practice providers | Oncology                     | 77 (55 physicians, 16 pharmacists, 9 advanced practice providers) | US     | B | <ul style="list-style-type: none"> <li>Understanding of biosimilars</li> <li>What information clinicians need prior to biosimilar adoption</li> </ul>                                                                             | <ul style="list-style-type: none"> <li>Understanding of biosimilars was low</li> <li>Educational needs are high</li> <li>40% increase in clinicians' prescribing likelihood after a biosimilar is designated as interchangeable</li> </ul> |
| 2019                              | Gary, C. <i>et al.</i> <sup>98</sup>   | Delphi method         | Patients and HCPs                                    | Haematology                  | 50 patients, 22 HCPs                                              | France | A | <ul style="list-style-type: none"> <li>Consensus on the important information that should be given to patients during an initial consultation</li> <li>To what extent cost and biosimilar choice needs to be discussed</li> </ul> | <ul style="list-style-type: none"> <li>Patients and HCP are aware of the increasing cost of the drugs and the economic impact on society</li> <li>Most patients trust their HCP in the choice of the most efficient therapy</li> </ul>     |
| <b>Multiple therapeutic areas</b> |                                        |                       |                                                      |                              |                                                                   |        |   |                                                                                                                                                                                                                                   |                                                                                                                                                                                                                                            |
| 2016                              | Tanabe, K. <i>et al.</i> <sup>99</sup> | Survey                | Physicians and pharmacists                           | Rheumatologists, oncologists | 220 physicians, 90 pharmacists                                    | Japan  | E | <ul style="list-style-type: none"> <li>Extent of awareness and understanding of biosimilars</li> </ul>                                                                                                                            | <ul style="list-style-type: none"> <li>Awareness of biosimilars was low</li> <li>58-73% showed intent to prescribe biosimilars. Main reasons: reduction of burden on patients, confirmed similarity in efficacy/safety</li> </ul>          |

|      |                                            |                                                                     |                                                   |                                                                                |                                                                                                        |                                                             |   |                                                                                                                                                                                                                                                                                                                                      |                                                                                                                                                                                                                                                                                                                                                                                                              |
|------|--------------------------------------------|---------------------------------------------------------------------|---------------------------------------------------|--------------------------------------------------------------------------------|--------------------------------------------------------------------------------------------------------|-------------------------------------------------------------|---|--------------------------------------------------------------------------------------------------------------------------------------------------------------------------------------------------------------------------------------------------------------------------------------------------------------------------------------|--------------------------------------------------------------------------------------------------------------------------------------------------------------------------------------------------------------------------------------------------------------------------------------------------------------------------------------------------------------------------------------------------------------|
| 2016 | Jacobs, I.<br><i>et al.</i> <sup>100</sup> | Survey                                                              | Patients,<br>caregivers,<br>general<br>population | Gastroenterology,<br>rheumatology,<br>dermatology,<br>oncology,<br>haematology | 3198                                                                                                   | France,<br>Spain,<br>Germany,<br>Italy, UK,<br>US           | D | <ul style="list-style-type: none"> <li>• Levels of awareness, usage, and knowledge of biosimilars</li> <li>• Perceptions of biosimilars compared to originator biologics</li> <li>• Perceived benefits and drawbacks of clinical trials</li> <li>• Impact of advocacy groups on patients' willingness to try a biosimilar</li> </ul> | <ul style="list-style-type: none"> <li>• Awareness of biosimilars was low (6% in general population, 20-30% in diagnosed advocacy group)</li> <li>• Immediate need exists for patient education about biosimilars and clinical trials</li> <li>• Gaps in knowledge about biosimilars included safety, efficacy, and access</li> </ul>                                                                        |
| 2016 | Pasina, L.<br><i>et al.</i> <sup>101</sup> | Survey during a series of educational interventions (presentations) | Hospital specialists and pharmacists              | Rheumatology, gastroenterology, nephrology, paediatrics, hospital pharmacy     | 446 specialists and 133 pharmacists participated/ 214 specialists, 36 pharmacists completed the survey | Italy (in the 15 Local Health Units of the Lombardy Region) | A | <ul style="list-style-type: none"> <li>• Attitude to prescribing biosimilars</li> <li>• Opinion about the quality, efficacy and safety of biosimilars</li> </ul>                                                                                                                                                                     | <ul style="list-style-type: none"> <li>• Knowledge of the scientific principles for biosimilar approval considered poor by most of specialists</li> <li>• 41% of specialists compared with 8% of hospital pharmacists had doubts about the scientific validity of extrapolation of indications, requiring a clinical trial in each indication</li> <li>• Main doubts: supposed lesser efficacy of</li> </ul> |

|      |                                              |                 |                                              |                                                                                                                                                |                                                     |               |   |                                                                                                                                                                                                                                                              |                                                                                                                                                                                                                                                                                                                                                                                                         |
|------|----------------------------------------------|-----------------|----------------------------------------------|------------------------------------------------------------------------------------------------------------------------------------------------|-----------------------------------------------------|---------------|---|--------------------------------------------------------------------------------------------------------------------------------------------------------------------------------------------------------------------------------------------------------------|---------------------------------------------------------------------------------------------------------------------------------------------------------------------------------------------------------------------------------------------------------------------------------------------------------------------------------------------------------------------------------------------------------|
|      |                                              |                 |                                              |                                                                                                                                                |                                                     |               |   |                                                                                                                                                                                                                                                              | biosimilars and concern for the higher risk of adverse drug reactions                                                                                                                                                                                                                                                                                                                                   |
| 2017 | Chapman, S.R. <i>et al.</i> <sup>102</sup>   | Survey          | Consultants, registrars, pharmacists, nurses | Dermatology, diabetology, gastroenterology, rheumatology                                                                                       | 243                                                 | UK            | A | <ul style="list-style-type: none"> <li>Knowledge and attitudes towards infliximab and insulin glargine biosimilars</li> <li>Factors influencing prescribing</li> <li>HCPs' attitudes compared with the utilisation of biosimilars in UK hospitals</li> </ul> | <ul style="list-style-type: none"> <li>Well informed about biosimilars with high level of awareness</li> <li>Safety and efficacy concerns higher in switching than in initiating biosimilars</li> <li>Personal experience of biologics as well as discipline-specific guidance probably influenced prescribers' responses</li> </ul>                                                                    |
| 2017 | O'Callaghan, J. <i>et al.</i> <sup>103</sup> | Survey          | Physicians and pharmacists                   | Community pharmacy, general practice, dermatology, endocrinology, gastroenterology, haematology, nephrology, neurology, oncology, rheumatology | 102 specialists, 253 GPs, 125 community pharmacists | Ireland       | B | <ul style="list-style-type: none"> <li>Awareness of and attitudes to biosimilars (compared to generics, familiarity, naming, pharmacovigilance, prescriber behaviour, substitution, prescriber concerns, medical information sources)</li> </ul>             | <ul style="list-style-type: none"> <li>The majority of specialists and pharmacists claimed to be very familiar/familiar with the term biosimilar, 60% of GPs were unable to define or had never heard of the term</li> <li>Majority of specialists opposed pharmacist-led substitution of biological medicines, some thought it could be appropriate if agreed with the clinician in advance</li> </ul> |
| 2018 | Aladul, M.I. <i>et al.</i>                   | Semi-structured | Healthcare consultants,                      | Gastroenterology, rheumatology,                                                                                                                | 22                                                  | West Midlands | A | <ul style="list-style-type: none"> <li>Perceptions and perspectives</li> </ul>                                                                                                                                                                               | <ul style="list-style-type: none"> <li>Good knowledge of biosimilars and were</li> </ul>                                                                                                                                                                                                                                                                                                                |

|                                   |                                           |                            |                                                               |                                                                   |                                             |         |   |                                                                                                                                                                                            |                                                                                                                                                                                                                                                                                                                                                                                |
|-----------------------------------|-------------------------------------------|----------------------------|---------------------------------------------------------------|-------------------------------------------------------------------|---------------------------------------------|---------|---|--------------------------------------------------------------------------------------------------------------------------------------------------------------------------------------------|--------------------------------------------------------------------------------------------------------------------------------------------------------------------------------------------------------------------------------------------------------------------------------------------------------------------------------------------------------------------------------|
|                                   | <i>al.</i> <sup>104</sup>                 | interviews                 | nurses,<br>pharmacists                                        | endocrinology                                                     |                                             | area UK |   | towards<br>biosimilar<br>infliximab,<br>etanercept and<br>insulin glargine <ul style="list-style-type: none"> <li>Potential barriers and facilitators to biosimilar prescribing</li> </ul> | content to initiate them <ul style="list-style-type: none"> <li>Disagreed with biosimilar substitution at pharmacy level and multiple switching</li> <li>Identified barriers: safety and efficacy concerns, patients' opinion and how cost savings are shared were the identified barriers</li> <li>Suggested facilitators: real-life data and financial incentives</li> </ul> |
| 2019                              | Aladul, M.I. <i>et al.</i> <sup>105</sup> | Survey                     | Medical consultants/<br>registrars,<br>nurses,<br>pharmacists | Dermatology,<br>diabetology,<br>gastroenterology,<br>rheumatology | 243                                         | UK      | A | <ul style="list-style-type: none"> <li>Knowledge and attitudes towards infliximab and insulin glargine biosimilars</li> </ul>                                                              | <ul style="list-style-type: none"> <li>Medical consultants/registrars and pharmacists had safety and efficacy concerns when switching patients compared to initiation.</li> <li>Nurses had similar levels of safety and efficacy concerns about initiation</li> <li>HCPs more comfortable with the initiation of biosimilars than switching</li> </ul>                         |
| <b>Non-specific/non-specified</b> |                                           |                            |                                                               |                                                                   |                                             |         |   |                                                                                                                                                                                            |                                                                                                                                                                                                                                                                                                                                                                                |
| 2014                              | Dylst, P. <i>et al.</i> <sup>106</sup>    | Semi-structured interviews | Physicians, authorities, academia, industry, pharmacists,     | Non-specific                                                      | 19 (2 physicians, 2 pharmacists, 1 patient) | Belgium | B | Barriers that impede the uptake of biosimilars in Belgium                                                                                                                                  | <ul style="list-style-type: none"> <li>Lack of confidence towards biosimilars</li> <li>Uncertainty about the interchangeability and substitution of</li> </ul>                                                                                                                                                                                                                 |

|                                                                                                                                                                                                                                                                                                                                                |  |  |          |  |  |  |  |  |             |
|------------------------------------------------------------------------------------------------------------------------------------------------------------------------------------------------------------------------------------------------------------------------------------------------------------------------------------------------|--|--|----------|--|--|--|--|--|-------------|
|                                                                                                                                                                                                                                                                                                                                                |  |  | patients |  |  |  |  |  | biosimilars |
| A: no declared COI, B: declared COI (or disclosure of interest) (e.g. HCPs/academics providing advice/paid consultancy to industry), C: industry sponsoring/educational grant from industry to support independent research declared, D: research conducted by industry/lobby organization/consultancy, E: potential funding/COI not specified |  |  |          |  |  |  |  |  |             |
| <i>Anti-TNF: anti- tumour necrosis factor, COI: conflict of interest, EFCCA: European Federation of Crohn's and Ulcerative Colitis Association, GP: general practitioner, HCPs: healthcare professionals, KOL: Key opinion leaders, NHS: United Kingdom National Health Service, RA: Rheumatoid Arthritis, RP: reference products</i>          |  |  |          |  |  |  |  |  |             |

## References

1. Danese S, Fiorino G, Michetti P. Viewpoint: Knowledge and viewpoints on biosimilar monoclonal antibodies among members of the European Crohn's and Colitis Organization. *J Crohn's Colitis*. 2014;8(11):1548–50.
2. Baji P, Gulácsi L, Golovics PA, et al. Perceived Risks Contra Benefits of Using Biosimilar Drugs in Ulcerative Colitis: Discrete Choice Experiment among Gastroenterologists. *Value Heal Reg Issues*. 2016;10:85–90.
3. Danese S, Fiorino G, Michetti P. Changes in biosimilar knowledge among European Crohn's Colitis Organization [ECCO] members: An updated survey. *J Crohn's Colitis*. 2016 Apr;10(11):1362–5.
4. Malter LB, Jain A, Cohen B, et al. 18 Clinical Practitioners' Education and Resource Needs for Inflammatory Bowel Diseases. *Gastroenterology*. 2019;156(3):S1–2.
5. Park S-K, Moon W, Kim ES, et al. Knowledge and Viewpoints on Biosimilar Monoclonal Antibodies among Asian Physicians: Comparison with European Physicians. *Korean J Gastroenterol*. 2019;74(6):333–40.
6. Grabowski D, Henderson B, Lam D, et al. Attitudes towards subsequent entry biologics/biosimilars: A survey of Canadian rheumatologists. *Clin Rheumatol*. 2015;34(8):1427–33.
7. Beck M, Michel B, Rybarczyk-Vigouret M-C, et al. Rheumatologists' Perceptions of Biosimilar Medicines Prescription: Findings from a French Web-Based Survey. *BioDrugs*. 2016;30(6):585–92.
8. Gavan S, Daker-White G, Barton A, et al. Exploring factors which influence anti-TNF treatment decisions for rheumatoid arthritis in England-a qualitative analysis. *Ann Rheum Dis*. 2016;75:131–2.
9. Kellner H, Domènech E, Lakatos P., et al. Awareness and acceptance of biosimilars by rheumatologists in eleven EU countries. *Ann Rheum Dis*. 2016;75:1008.
10. Gibofsky A, Badawi S. Biosimilar knowledge among us rheumatologists-a survey. *Arthritis Rheumatol*. 2017;69.
11. Klink A, Yeh T, Jeune-Smith Y, et al. Community Rheumatologists' Experience and Views on Non-Medical Switching To Biosimilars. *Value Heal*. 2019;22(May):S390.
12. Zhang C, Baldock D, Baynton E. Physician perceptions of biologics versus their biosimilar counterparts in Rheumatology: A multicountry study in europe. *Ann Rheum Dis*. 2019;78:611.
13. Barsell A, Rengifo-Pardo M, Ehrlich A. A Survey Assessment of US Dermatologists' Perception of Biosimilars. *J Drugs Dermatol*. 2017;16(6):612–5.
14. Manalo IF, Gilbert KE, Wu JJ. The current state of dermatologists' familiarity and perspectives of biosimilars for the treatment of psoriasis: A global cross-sectional survey. *J Drugs Dermatology*. 2017;16(4):336–43.
15. Baer WH, Maini A, Jacobs I. Barriers to the access and use of rituximab in patients with non-Hodgkin's lymphoma and chronic lymphocytic leukemia: A physician survey. *Pharmaceuticals*. 2014;7(5):530–44.
16. Nabhan C, Fillman J, Ernst FR, et al. Community oncologists' perception and understanding of biosimilars' role in oncology. *Value Heal*. 2017;20(5):A136.

17. Giuliani R, Tabernero J, Cardoso F, et al. Knowledge and use of biosimilars in oncology: A survey by the European Society for Medical Oncology. *ESMO Open*. 2019;4(2):1–9.
18. Hadoussa S, Bouhlef M, Soussi MA, et al. Perception of hematologists and oncologists about the biosimilars: A prospective Tunisian study based on a survey. *J Oncol Pharm Pract*. 2020 May 19;26(1):124–32.
19. Micó-Pérez RM, Payares-Herrera C, Palomo-Jiménez PI, et al. Knowledge about Biosimilars in Primary Care: a study by the Spanish Society of Primary Care Physicians (SEMERGEN). *Semergen*. 2018;44(6):380–8.
20. BioTrends research group. Biosimilars Advisory Service : Physician Perspectives on Biologics in Immunology and Infectious Disease. 2014.
21. Dolinar RO, Reilly MS. Biosimilars naming, label transparency and authority of choice -survey findings among European physicians. *GaBI J*. 2014;3(2):58–62.
22. Gewanter HL, Reilly MS. Prescribing practices for biosimilars: questionnaire survey findings from physicians in Argentina, Brazil, Colombia and Mexico. *GaBI J*. 2015;4(4):161–6.
23. Hallersten A, Fürst W, Mezzasalma R. Physicians prefer greater detail in the biosimilar label (SmPC) - Results of a survey across seven European countries. *Regul Toxicol Pharmacol*. 2016;77:275–81.
24. Molinari AL, Gewanter HL, Reilly M, et al. Differences in physicians' understanding of biologic and biosimilar medicines in the USA and Europe. *Mov Disord*. 2016;31:S595–6.
25. Cohen H, Beydoun D, Chien D, et al. Awareness, Knowledge, and Perceptions of Biosimilars Among Specialty Physicians. *Adv Ther*. 2017;33(12):2160–72.
26. Everaerts M. Market research on the perception, awareness and usage of biosimilars with healthcare professionals - Master in Drug Development report. 2017.
27. Hemmington A, Dalbeth N, Jarrett P, et al. Medical specialists' attitudes to prescribing biosimilars. *Pharmacoepidemiol Drug Saf*. 2017;
28. Murby SP, Reilly MS. A survey of Australian prescribers' views on the naming and substitution of biologicals. *Generics Biosimilar Initiative J*. 2017;6(3):107–13.
29. Jiménez-Pichardo L, Gázquez-Pérez R, Sierra-Sánchez JF. Degree of prescriber's knowledge about variability in biological drugs "innovators" in manufacturing process. *Eur J Clin Pharmacol*. 2018;74(4):505–11.
30. Karki C, Baskett A, Baynton E, et al. Perceptions of cost pressure associated with biosimilars among physicians in Europe. *Value Heal*. 2018;21:Supplement 1 (S253).
31. Shah-Manek B, Baskett A, Baynton E, et al. Perceptions of biosimilars across physician specialities in Europe. *Value Heal*. 2018;21:Supplement 1 (S265).
32. Schwartz Z, Schulz J, Vinther A, et al. Uncovering clinicians' gaps and attitudes toward biosimilars: Impact of a 2-phase educational program. *Arthritis Rheumatol*. 2018;70:Supplement 9 (2814-2815).
33. Industry Standard Research/ASBM. ASBM European Prescribers Survey. 2019.
34. Karateev D, Belokoneva N. Evaluation of physicians' knowledge and attitudes towards biosimilars in Russia and issues associated with their prescribing. *Biomolecules*. 2019;9(2).
35. Teeple A, Ellis LA, Huff L, et al. Physician attitudes about non-medical switching to biosimilars: results from an online physician survey in the United States. *Curr Med Res Opin*. 2019;35(4):611–7.

36. Cassar K, Zammit Dimech D, Grech L, et al. Biosimilars: The perception amongst maltese clinicians. *Ann Rheum Dis*. 2016;75:1294.
37. Sidikou O, Mondoloni P, Leroy B, et al. Biosimilars: What do clinicians actually think? *Eur J Hosp Pharm*. 2016;23:A47–8.
38. Fernandez-Lopez S, Kazzaz D, Bashir M, et al. Assessment of pharmacists' views on biosimilar naming conventions. *J Manag Care Pharm*. 2015;21(3):188–95.
39. Cogora. Knowledge gaps and needs of hospital pharmacists when evaluating biosimilar agents. 2016.
40. Reilly MS, Schneider P. Naming and labelling of biologicals – the perspective of hospital and retail pharmacists. *GaBI J*. 2016;5(4):151–5.
41. Tomaszewski D. Biosimilar naming conventions: Pharmacist perceptions and impact on confidence in dispensing biologics. *J Manag Care Spec Pharm*. 2016;22(8):919–26.
42. Adé A, Bourdon O, Bussi  res JF. A survey of pharmacists' knowledge and views of biosimilars in Quebec and France. *Ann Pharm Fran  aises*. 2017;75(4):267–75.
43. Beck M, Michel B, Rybarczyk-Vigouret M-C, et al. Knowledge, behaviors and practices of community and hospital pharmacists towards biosimilar medicines: Results of a French web-based survey. *MAbs*. 2017;9(2):384–91.
44. A. A, E. P, J.-F. B. Impact of a training session on pharmacists' knowledge and views of biosimilars. *J Pharm Clin* [Internet]. 2018;37(1):9–18. Available from: <http://www.embase.com/search/results?subaction=viewrecord&from=export&id=L621278937>
45. Greene L, Singh RM, Carden MJ, et al. Strategies for Overcoming Barriers to Adopting Biosimilars. *J Manag Care Spec Pharm*. 2019;25(8):904–12.
46. Paw  owska I, Paw  owski L, Krzy  aniak N, et al. Perspectives of Hospital Pharmacists Towards Biosimilar Medicines: A Survey of Polish Pharmacy Practice in General Hospitals. *BioDrugs*. 2019;33(2):183–91.
47. Willis L, Tanzola M. Biosimilars in oncology: An online activity has a significant educational impact on pharmacists. *J Oncol Pharm Pract*. 2019;25(3):19.
48. Thakur K, Biberger A, Handrich A, et al. Perceptions and Preferences of Two Etanercept Autoinjectors for Rheumatoid Arthritis: A New European Union-Approved Etanercept Biosimilar (Benepali  ) Versus Etanercept (Enbrel  ) - Findings from a Nurse Survey in Europe. *Rheumatol Ther*. 2016;3(1):77–89.
49. Attara G, Bressler B, Bailey R, et al. Canadian patient and caregiver perspectives on subsequent entry biologics/ biosimilars for inflammatory bowel disease. *Gastroenterology*. 2016;150(4):S443–4.
50. Renton WD, Leveret H, Guly C, et al. Same but different? A thematic analysis on adalimumab biosimilar switching among patients with juvenile idiopathic arthritis. *Pediatr Rheumatol*. 2019;17(1):1–7.
51. Peyrin-Biroulet L, L  nnfors S, Roblin X, et al. Patient perspectives on biosimilars: A survey by the European federation of crohn's and ulcerative colitis associations. *J Crohn's Colitis*. 2017;11(1):128–33.
52. Pineles D, Arsuaga A, Malter L, et al. Patient perceptions regarding the use of biosimilars in inflammatory bowel disease. *Am J Gastroenterol Conf 82nd Annu Sci Meet Am Coll Gastroenterol United states*. 2017;112(Supplement 1):S418-s419.
53. Chelle AH-D, Cluzeau V, Condat J, et al. Tu1035 – Impact of Patient Education on Switch

- Acceptance in IBD Patients in Remission, with Infliximab Originator Switched for an Infliximab Biosimilar: A Prospective Study. *Gastroenterology*. 2019;156(6):S-955-S-956.
54. Coget E., Laffont-Lozes P., Velasco Gonzalvo V., Huc D., Rosant D. BC. Evaluation of knowledge of patients with inflammatory bowel disease treated by the reference product concerning biosimilars: Role of clinical pharmacists. *Eur J Hosp Pharm*. 2019;26:Supplement 1 (A135-A136).
  55. Haghnejad V, Le C, Dominique Y, et al. Impact of a medical interview on the decision to switch from originator infliximab to its biosimilar in patients with inflammatory bowel disease. *Dig Liver Dis*. 2019;
  56. Petitdidier N, Tannoury J, de'Angelis N, et al. Patients' perspectives after switching from infliximab to biosimilar CT-P13 in patients with inflammatory bowel disease: A 12-month prospective cohort study. *Dig Liver Dis*. 2019;51(12):1652–60.
  57. Peyrin-Biroulet L, Lönnfors S, Avedano L, et al. Changes in inflammatory bowel disease patients' perspectives on biosimilars: A follow-up survey. *United Eur Gastroenterol J*. 2019;
  58. Berghea F, Popescu C, Ionescu R, et al. Biosimilars use in rheumatology-the patient perspective. *Ann Rheum Dis*. 2014;73.
  59. Sekhon S, Rai R, McClory D, et al. Patient perspectives on the introduction of subsequent entry biologics in Canada. *Arthritis Rheumatol*. 2014;66:S663.
  60. Thakur K, Biberger A, Handrich A, et al. Patient Perceptions and Preferences of Two Etanercept Autoinjectors for Rheumatoid Arthritis: Findings from a Patient Survey in Europe. *Rheumatol Ther*. 2016;3(2):245–56.
  61. Aladul MI, Fitzpatrick RW, Chapman SR. Patients' Understanding and Attitudes Towards Infliximab and Etanercept Biosimilars: Result of a UK Web-Based Survey. *BioDrugs*. 2017;31(5):439–46.
  62. Kovitwanichkanont T, Wang D, Wapola N, et al. Biosimilar medicine is acceptable to patients if recommended by a rheumatologist in an australian tertiary ra cohort. *Intern Med J*. 2018;48:Supplement 4 (46).
  63. Claudia C., Opris-Belinski D., Codreanu C. IR. Patient state of knowledge on biosimilars-do physicians need to improve education skills? *Ann Rheum Dis*. 2019;78:Supplement 2 (1446-1447).
  64. Frantzen L, Cohen JD, Tropé S, et al. Patients' information and perspectives on biosimilars in rheumatology: A French nation-wide survey. *Jt Bone Spine*. 2019;86(4):491–6.
  65. Petit J, Antignac M, Poilverd RM, et al. How to reduce the nocebo effect when switching from originator infliximab to a biosimilar: Positive results of a multidisciplinary team intervention. *Ann Rheum Dis*. 2019;78:1447–8.
  66. Robinson S, Mekayil B, Hall T, et al. PATIENT EXPERIENCE OF SWITCHING FROM ENBREL TO BENAPALI. *Rheumatology*. 2019;58:Supplement 3.
  67. Scherlinger M, Langlois E, Germain V, et al. Acceptance rate and sociological factors involved in the switch from originator to biosimilar etanercept (SB4). *Semin Arthritis Rheum*. 2019;48(5):927–32.
  68. Azevedo A, Bettencourt A, Selores M, et al. Biosimilar agents for psoriasis treatment: The perspective of Portuguese patients. *Acta Med Port*. 2018;31(9):496–500.
  69. Ighani A, Wang JY, Manolson MF. Biosimilar viewpoints from the perspective of psoriasis patients who use either biologic or systemic treatments. *J Am Acad Dermatol*. 2018;79(3):Supplement 1 (AB57).

70. Wilkins AR, Venkat M V, Brown AS, et al. Patient perspectives on biosimilar insulin. *J Diabetes Sci Technol*. 2014;8(1):23–5.
71. Leonardi Reyes F, Hauber B, Boeri M, et al. Patient Preferences for Biologic and Biosimilar Osteoporosis Treatments in Colombia: a Discrete-Choice Experiment. *Value Heal Reg Issues*. 2019;19(October):S54.
72. Malassigne M., Megne-Wabo M., Rigalleau V., Mohammedi K., Xuereb F. BD. Impact of pharmaceutical interview in patient acceptance of insulin Glargine's biosimilar 100ui/ml. *Eur J Hosp Pharm*. 2019;26:Supplement 1 (A71).
73. Harvey RD, McGrath M, Cook JW, et al. How will the cost of biosimilars affect patients' willingness to receive them? *J Clin Oncol*. 2019;37(15):suppl.e18338.
74. Ismailov RM, Khasanova ZD, Gascon P. Knowledge and awareness of biosimilars among oncology patients in Colorado, USA. *Futur Oncol*. 2019;15(22).
75. Badley E, Gignac M, Bowlby D, et al. Factors associated with decisions to transition to a different biologic, including biosimilar: The patients' perspective. *J Rheumatol*. 2017;44(6):864.
76. Baudrant M, Roche A, Allenet B, et al. Interchangeability by a biosimilar of infliximab: What do patients think? *J Crohn's Colitis*. 2018;12:S504–5.
77. Teeple A, Ginsburg S, Howard L, et al. Patient attitudes about non-medical switching to biosimilars: results from an online patient survey in the United States. *Curr Med Res Opin*. 2019;35(4):603–9.
78. Wong-Rieger D. Naive and expert patients' knowledge, attitudes and beliefs about biosimilars. *Value Heal*. 2017;20(5):A17.
79. Cvancarova Småstuen M, Brandvold M, Andenæs R. IS PATIENTS' SATISFACTION WITH BEING SWITCHED TO A BIOSIMILAR MEDICATION ASSOCIATED WITH THEIR LEVEL OF HEALTH LITERACY? RESULTS FROM A NORWEGIAN USER SURVEY. *Ann Rheum Dis*. 2018;77(June):86.
80. Barbosa CM-M, Rodríguez de Castro B, Labeaga Beramendi Y, et al. Patient satisfaction survey: substitution of reference etanercept with a biosimilar product. *Eur J Hosp Pharm*. 2019 Sep 4;ejhpharm-2019-001999.
81. Sullivan E, Piercy J, Waller J, et al. Assessing gastroenterologist and patient acceptance of biosimilars in ulcerative colitis and Crohn's disease across Germany. *PLoS One*. 2017 Apr;12(4).
82. D'Amico F, Pouillon L, Argollo M, et al. Multidisciplinary management of the nocebo effect in biosimilar-treated IBD patients: Results of a workshop from the NOCE-BIO consensus group. *Dig Liver Dis*. 2019;
83. Fenwick S, Thakur K, Munro D. Nurse and Patient Perceptions and Preferences for Subcutaneous Autoinjectors for Inflammatory Joint or Bowel Disease: Findings from a European Survey. *Rheumatol Ther*. 2019;6(2):195–206.
84. Sewak NPS, Jones C. Anti-TNF biosimilars indicated for rheumatoid arthritis are increasingly available in Europe: How do payers and key stakeholders perceive them? *Value Heal*. 2014;17(7):A388.
85. White R, Mallinson M. Biosimilars: Friends or foe for payers, physicians and manufacturers? *Value Heal*. 2014;17(3):A54.
86. Piercy J, Waller J, Sullivan E, et al. Patient attitudes towards being prescribed biosimilars in inflammatory autoimmune diseases in Germany. *Arthritis Rheumatol*. 2016;68:1788–9.

87. Funahashi K, Yoshitama T, Tetsu Oyama T, et al. Survey on generic drugs (GE) and bio-similar drugs (BIO-S) of patients with rheumatoid arthritis (RA) and their doctors-cohort study of the Japanese clinician biologics research group. *Ann Rheum Dis*. 2017;76:1471.
88. Jorgensen TS, Skougaard M, Asmussen HC, et al. Communication strategies are highly important to avoid nocebo effect when performing non-medical switch from originator product to biosimilar product: Danish results from applying the Parker model a qualitative 3-step research model. *Arthritis Rheumatol*. 2017;69(10).
89. Radtchenko J, Smith Y, Kish J, et al. Perceptions of us community rheumatologists on biosimilars. *Arthritis Rheumatol*. 2017;69.
90. van Overbeeke E, De Beleyr B, de Hoon J, et al. Perception of Originator Biologics and Biosimilars: A Survey Among Belgian Rheumatoid Arthritis Patients and Rheumatologists. *BioDrugs*. 2017;31(5):447–59.
91. Waller J, Sullivan E, Piercy J, et al. Assessing physician and patient acceptance of infliximab biosimilars in rheumatoid arthritis, ankylosing spondyloarthritis and psoriatic arthritis across Germany. *Patient Prefer Adherence*. 2017;11:519–30.
92. Marona J, Manica SR, Lopes C, et al. Non-medical switch to biosimilars: What have we learned? *Arthritis Rheumatol*. 2018;70:231–2.
93. Robinson K, Esgro R. Revealing and addressing knowledge gaps regarding biosimilars in rheumatology practice with targeted continuing education and patient surveys. *Arthritis Rheumatol*. 2018;70:Supplement 9 (2808-2809).
94. Gardiner RB. Perceptions of biosimilar monoclonal antibodies amongst EU5 budget holders. *Value Heal*. 2015;18(3):A200–1.
95. McCarthy T, Amin V, Bill T, et al. Biosimilars adoption – Getting it right 1st time. *J Oncol Pharm Pract*. 2017;23(8):32–3.
96. Murphy P, Amin V, Bill T, et al. Impact of education programme on biosimilar attitudes and beliefs. *J Oncol Pharm Pract*. 2017;23(8):59–60.
97. Cook JW, McGrath MK, Dixon MD, et al. Academic oncology clinicians’ understanding of biosimilars and information needed before prescribing. *Ther Adv Med Oncol*. 2019;11:1–12.
98. Gary C, Schiavon De Jodar A, Deljehier T, et al. Are patients and healthcare professionals willing to exchange the price of treatments to choose a biosimilar? experience based on the delphi method. *Eur J Hosp Pharm*. 2019;26:A194.
99. Tanabe K, Sugimoto N, Fujimoto Y. A web-based survey to investigate the extent of awareness and understanding for biosimilar among Japanese physicians and pharmacists. *Value Heal*. 2015;18(7):A658.
100. Jacobs I, Singh E, Sewell KL, et al. Patient attitudes and understanding about biosimilars: An international cross-sectional survey. *Patient Prefer Adherence*. 2016;10:937–48.
101. Pasina L, Casadei G, Nobili A. A survey among hospital specialists and pharmacists about biosimilars. *Eur J Intern Med*. 2016;35:e31–3.
102. Chapman SR, Fitzpatrick RW, Aladul MI. Knowledge, attitude and practice of healthcare professionals towards infliximab and insulin glargine biosimilars: Result of a UK web-based survey. *BMJ Open*. 2017;7(6):1–8.
103. O’Callaghan J, Bermingham M, Leonard M, et al. Assessing awareness and attitudes of healthcare professionals on the use of biosimilar medicines: A survey of physicians and pharmacists in Ireland. *Regul Toxicol Pharmacol*. 2017;88:252–61.

104. Aladul MI, Fitzpatrick RW, Chapman SR. Healthcare professionals' perceptions and perspectives on biosimilar medicines and the barriers and facilitators to their prescribing in UK: A qualitative study. *BMJ Open*. 2018;8(11):1–8.
105. Aladul MI, Fitzpatrick RW, Chapman SR. Differences in UK healthcare professionals' knowledge, attitude and practice towards infliximab and insulin glargine biosimilars. *Int J Pharm Pract*. 2019;27(2):214–7.
106. Dylst P, Vulto A, Simoens S. Barriers to the uptake of biosimilars and possible solutions: A Belgian case study. *Pharmacoeconomics*. 2014;32(7):681–91.
