# Supplementary material for: European Stakeholder Learnings Regarding Biosimilars: Part I—Improving Biosimilar Understanding and Adoption
Source: PubMed Central journal article supplement — BioDrugs. 2020 Nov 3;34(6):783–96. doi: 10.1007/s40259-020-00452-9 (PMC7669769; doi:10.1007/s40259-020-00452-9), 2020-11-03
Supplement: 40259_2020_452_MOESM6_ESM.pdf [file 40259_2020_452_MOESM6_ESM.pdf]

**European stakeholder learnings regarding biosimilars: Part I – improving biosimilar understanding and adoption**

BioDrugs

Liese Barbier<sup>1\*</sup>, Steven Simoens<sup>1</sup>, Arnold G. Vulto<sup>1,2+\*</sup>, Isabelle Huys<sup>1+</sup>

<sup>1</sup>KU Leuven, Department of Pharmaceutical and Pharmacological Sciences, Leuven, Belgium

<sup>2</sup>Hospital Pharmacy, Erasmus University Medical Center, Rotterdam, the Netherlands

<sup>+</sup> Joint last author: these authors contributed equally to this work

<sup>\*</sup> Corresponding author:

Arnold G. Vulto Contact: a.vulto@gmail.com

Liese Barbier Contact: liese.barbier@kuleuven.be

## Online Resource 6 Participant's characteristics – II

| Participants' characteristics                                                                                                                                                                                                                                                                                                                                                        |                     |    |
|--------------------------------------------------------------------------------------------------------------------------------------------------------------------------------------------------------------------------------------------------------------------------------------------------------------------------------------------------------------------------------------|---------------------|----|
| Characteristics                                                                                                                                                                                                                                                                                                                                                                      | Participants (n=44) |    |
|                                                                                                                                                                                                                                                                                                                                                                                      | <i>n</i>            | %  |
| <b>Country</b>                                                                                                                                                                                                                                                                                                                                                                       |                     |    |
| Austria                                                                                                                                                                                                                                                                                                                                                                              | 1                   | 2  |
| Belgium                                                                                                                                                                                                                                                                                                                                                                              | 5                   | 11 |
| Croatia                                                                                                                                                                                                                                                                                                                                                                              | 1                   | 2  |
| Denmark                                                                                                                                                                                                                                                                                                                                                                              | 3                   | 7  |
| EU perspective*                                                                                                                                                                                                                                                                                                                                                                      | 16                  | 36 |
| France                                                                                                                                                                                                                                                                                                                                                                               | 1                   | 2  |
| Ireland                                                                                                                                                                                                                                                                                                                                                                              | 1                   | 2  |
| Italy                                                                                                                                                                                                                                                                                                                                                                                | 1                   | 2  |
| Malta                                                                                                                                                                                                                                                                                                                                                                                | 1                   | 2  |
| Poland                                                                                                                                                                                                                                                                                                                                                                               | 1                   | 2  |
| Portugal                                                                                                                                                                                                                                                                                                                                                                             | 1                   | 2  |
| The Netherlands                                                                                                                                                                                                                                                                                                                                                                      | 7                   | 16 |
| UK                                                                                                                                                                                                                                                                                                                                                                                   | 1                   | 2  |
| Spain                                                                                                                                                                                                                                                                                                                                                                                | 3                   | 7  |
| Switzerland                                                                                                                                                                                                                                                                                                                                                                          | 1                   | 2  |
| <b>Stakeholder group</b>                                                                                                                                                                                                                                                                                                                                                             |                     |    |
| Hospital pharmacist                                                                                                                                                                                                                                                                                                                                                                  | 10                  | 23 |
| Nurse                                                                                                                                                                                                                                                                                                                                                                                | 9                   | 20 |
| Patient (representative)                                                                                                                                                                                                                                                                                                                                                             | 9                   | 20 |
| Physician                                                                                                                                                                                                                                                                                                                                                                            | 9                   | 20 |
| Regulator                                                                                                                                                                                                                                                                                                                                                                            | 7                   | 16 |
| <b>Therapeutic area</b>                                                                                                                                                                                                                                                                                                                                                              |                     |    |
| Endocrinology                                                                                                                                                                                                                                                                                                                                                                        | 1                   | 2  |
| Gastro-enterology                                                                                                                                                                                                                                                                                                                                                                    | 8                   | 18 |
| Hemato-oncology                                                                                                                                                                                                                                                                                                                                                                      | 7                   | 16 |
| Nephrology                                                                                                                                                                                                                                                                                                                                                                           | 1                   | 2  |
| Non-disease specific                                                                                                                                                                                                                                                                                                                                                                 | 21                  | 48 |
| Rheumatology                                                                                                                                                                                                                                                                                                                                                                         | 6                   | 14 |
| <i>EU: European, n: number</i>                                                                                                                                                                                                                                                                                                                                                       |                     |    |
| *Representing participants from European organizations or institutions (e.g. representatives of European stakeholder associations). Regulators involved in biosimilar regulatory activities on a European level (i.e. members of a European Medicines Agency committee and/or working party, such as the Biosimilar Medicinal Products Working Party), are included in this category |                     |    |
| Participants with a pan-European perspective often also provided (home) country specific insights and/or examples in addition to their pan-European perspective                                                                                                                                                                                                                      |                     |    |
