# Supplementary material for: European Stakeholder Learnings Regarding Biosimilars: Part I—Improving Biosimilar Understanding and Adoption
Source: Springer Nature journal article supplement (doi:10.1007/s40259-020-00452-9), 2020-11-03
Supplement: MOESM1 [file 24111474]

## European stakeholder learnings regarding biosimilars: Part I – improving biosimilar understanding and adoption

BioDrugs

Liese Barbier<sup>1\*</sup>, Steven Simoens<sup>1</sup>, Arnold G. Vulto<sup>1,2+\*</sup>, Isabelle Huys<sup>1+</sup>

<sup>1</sup>KU Leuven, Department of Pharmaceutical and Pharmacological Sciences, Leuven, Belgium

<sup>2</sup>Hospital Pharmacy, Erasmus University Medical Center, Rotterdam, the Netherlands

<sup>+</sup> Joint last author: these authors contributed equally to this work

<sup>\*</sup> Corresponding author:

Arnold G. Vulto Contact: a.vulto@gmail.com

Liese Barbier Contact: liese.barbier@kuleuven.be

### Online Resource 1. Search term used in systematic search of PubMed in January 2020

#### Search term used in systematic search of PubMed in January 2020

('physician'/exp OR physician OR 'pharmacist'/exp OR pharmacist OR 'nurse'/exp OR nurse OR 'patient'/exp OR patient OR prescriber OR 'clinician'/exp OR clinician OR provider OR 'healthcare professional'/exp OR 'healthcare professional' OR (('healthcare'/exp OR healthcare) AND professional) OR 'stakeholder'/exp OR stakeholder) AND ('biosimilar'/exp OR biosimilar) AND ('perspective'/exp OR perspective OR 'preference'/exp OR preference OR opinion OR 'knowledge'/exp OR knowledge OR 'understanding'/exp OR understanding OR survey OR 'interview'/exp OR interview))
