# Supplementary material for: European Stakeholder Learnings Regarding Biosimilars: Part I—Improving Biosimilar Understanding and Adoption
Source: Springer Nature journal article supplement (doi:10.1007/s40259-020-00452-9), 2020-11-03
Supplement: MOESM5 [file 24111474]

## European stakeholder learnings regarding biosimilars: Part I – improving biosimilar understanding and adoption

BioDrugs

Liese Barbier<sup>1\*</sup>, Steven Simoens<sup>1</sup>, Arnold G. Vulto<sup>1,2+\*</sup>, Isabelle Huys<sup>1+</sup>

<sup>1</sup>KU Leuven, Department of Pharmaceutical and Pharmacological Sciences, Leuven, Belgium

<sup>2</sup>Hospital Pharmacy, Erasmus University Medical Center, Rotterdam, the Netherlands

+ Joint last author: these authors contributed equally to this work

\* Corresponding author:

Arnold G. Vulto Contact: a.vulto@gmail.com

Liese Barbier Contact: liese.barbier@kuleuven.be

### Online Resource 5. Participant's characteristics – I

| Participants' characteristics                                                                                                                                                                                                                                                                                                                                                               |      |                                                                                                                    |                                                                                                 |
|---------------------------------------------------------------------------------------------------------------------------------------------------------------------------------------------------------------------------------------------------------------------------------------------------------------------------------------------------------------------------------------------|------|--------------------------------------------------------------------------------------------------------------------|-------------------------------------------------------------------------------------------------|
| Stakeholder                                                                                                                                                                                                                                                                                                                                                                                 | n=44 | Country                                                                                                            | Therapeutic area                                                                                |
| <b>Hospital pharmacist</b>                                                                                                                                                                                                                                                                                                                                                                  | 10   | Austria (1)<br>Belgium (2)<br>Croatia (1)<br>EU perspective (2)*<br>France (1)<br>Spain (1)<br>The Netherlands (2) | Non-disease specific (10)                                                                       |
| <b>Physician</b>                                                                                                                                                                                                                                                                                                                                                                            | 9    | Belgium (1)<br>EU perspective (2)*<br>Italy (1)<br>Spain (2)<br>The Netherlands (2)<br>UK (1)                      | Endocrinology (1)<br>Gastroenterology (3)<br>Nephrology (1)<br>Oncology (3)<br>Rheumatology (1) |
| <b>Nurse</b>                                                                                                                                                                                                                                                                                                                                                                                | 9    | Belgium (2)<br>Denmark (1)<br>EU perspective (1)*<br>Malta (1)<br>The Netherlands (3)<br>Switzerland (1)           | Gastroenterology (1)<br>Oncology (2)<br>Non-disease specific (3)<br>Rheumatology (3)            |
| <b>Patient (representative)</b>                                                                                                                                                                                                                                                                                                                                                             | 9    | Denmark (1)<br>EU perspective (6)*<br>Poland (1)<br>Portugal (1)                                                   | Gastroenterology (4)<br>Oncology (2)<br>Non-disease specific (1)<br>Rheumatology (2)            |
| <b>Regulator</b>                                                                                                                                                                                                                                                                                                                                                                            | 7    | Denmark (1)<br>EU perspective (5)*<br>Ireland (1)                                                                  | /                                                                                               |
| <i>*Representing participants from European organizations or institutions (e.g. representatives of European stakeholder associations). Regulators involved in biosimilar regulatory activities on a European level (i.e. members of a European Medicines Agency committee and/or working party, such as the Biosimilar Medicinal Products Working Party), are included in this category</i> |      |                                                                                                                    |                                                                                                 |
| <i>Participants with a pan-European perspective often also provided (home) country specific insights and/or examples in addition to their pan-European perspective</i>                                                                                                                                                                                                                      |      |                                                                                                                    |                                                                                                 |
| <i>EU: European, IBD: inflammatory bowel disease, N: number, UK: United Kingdom</i>                                                                                                                                                                                                                                                                                                         |      |                                                                                                                    |                                                                                                 |
